# Supplementary material for: Functionalized α,β-ynones: efficient ligand for Cu catalyzed Sonogashira-type cross-coupling reaction
Source: Royal Society of Chemistry journal article supplement (doi:10.1039/c6ra23742h), 2016-01-01

**Functionalized  $\alpha,\beta$ -Yrones: Efficient ligand for Cu catalyzed Sonogashira-type cross-coupling reaction**

Xian Wang,<sup>‡[a]</sup> Zhenghua Wang,<sup>[a]</sup> Zunyuan Xie,<sup>[a]</sup> Guofang Zhang,<sup>[a]</sup> Weiqiang Zhang\*<sup>[a]</sup> and Ziwei Gao\*<sup>[a]</sup>

Key Laboratory of Applied Surface and Colloid Chemistry, Ministry of Education, School of Chemistry & Chemical Engineering, Shaanxi Normal University, Xi'an 710062, P. R. China.;

Fax: (+) 86-29-81530821; E-mail: [zwq@snnu.edu.cn](mailto:zwq@snnu.edu.cn); [zwgao@snnu.edu.cn](mailto:zwgao@snnu.edu.cn)

|                                                                                          |       |
|------------------------------------------------------------------------------------------|-------|
| 1. General information.....                                                              | 2     |
| 2. Cu-catalyzed coupling of phenylacetylene with 4-iodoanisole.....                      | 2-3   |
| 3. Cu-catalyzed decarboxylative coupling of phenylpropionic acid with 4-iodoanisole..... | 4     |
| 4. Characterization of products.....                                                     | 5-12  |
| 5. <sup>1</sup> H NMR and <sup>13</sup> C NMR spectra .....                              | 13-43 |

## 1. General information:

All the reactions and manipulation were performed under dry nitrogen by using standard Schlenk techniques. DMF (N,N-dimethyl formamide) were distilled from calcium hydride, all of the solvents were stored in ampoules with Teflon tap under argon. The TLC (layer chromatography) was on the aluminium plates coating GF254 silica gel. Column Chromatography was performed on 200-300 mesh silica gel and the eluent of petroleum and ethylacetate. All halides and alkynes were purchased from Aldrich and Alfa Aesar. 99.99 % CuI was purchased from Aldrich. NMR spectra were recorded on a spectrometers at 400 MHz ( $^1\text{H}$  NMR), 101 MHz ( $^{13}\text{C}$  NMR). All  $^1\text{H}$  NMR spectra were reported in delta ( $\delta$ ) units, parts per million (ppm) downfield from the internal standard. Coupling constants are reported in Hertz (Hz).

## 2. Cu-catalyzed coupling of phenylacetylene with 4-iodoanisole

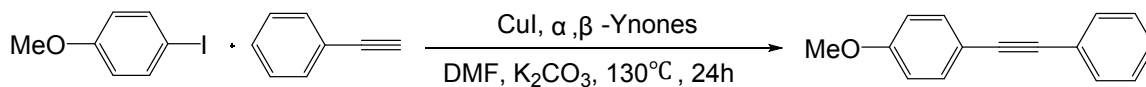

To a mixture of Cu salt (0.005 mmol), 1-iodo-4-methoxybenzene (0.5 mmol, 0.11 g),  $\text{K}_2\text{CO}_3$  (0.5mmol, 0.068 g),  $\alpha, \beta$ -Ynones (0.0125mmol) in a Schlenk tube, DMF (3.0 ml) was transferred via cannula. And then, Phenylacetylene (66  $\mu\text{l}$ , 0.6 mmol) are added dropwise. The reaction is stirred under nitrogen atmosphere at  $130^\circ\text{C}$  for 24 h. Then cooling to room temperature, after that, the mixture was poured into separating funnel (150 ml) and washed with water (50 ml). And then, it extracted with ethyl acetate (3 times, 15 ml). The organic layer was dried by anhydrous  $\text{MgSO}_4$ , then filtered and evaporated under vacuum. The crude product dissolved in  $\text{CDCl}_3$  (0.5 ml). The yields were calculated by comparing the integrations of methoxyl protons of starting materials, 4-iodo-anisole, and coupling product, 1-methoxy-4-(phenylethynyl)benzene. And column chromatography separation products on silica gel eluting with 10:1 petroleum ether/dichloromethane, get the target product 1-methoxy-4-(phenylethynyl)benzene, the yield was 96%, nuclear magnetic characterization.

**Table 1.** Optimization of Cu-catalyzed coupling of phenylacetylene with 4-iodoanisole.<sup>[a]</sup>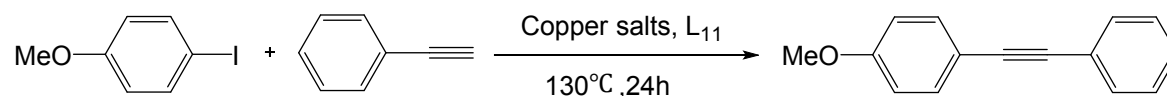

| Entry | Copper salts                         | Base                              | Solvent | Yield/% <sup>[b]</sup> |
|-------|--------------------------------------|-----------------------------------|---------|------------------------|
| 1     | CuI                                  | K <sub>2</sub> CO <sub>3</sub>    | DMF     | 90                     |
| 2     | CuBr                                 | K <sub>2</sub> CO <sub>3</sub>    | DMF     | 84                     |
| 3     | CuCl                                 | K <sub>2</sub> CO <sub>3</sub>    | DMF     | 48                     |
| 4     | Cu <sub>2</sub> O                    | K <sub>2</sub> CO <sub>3</sub>    | DMF     | ND                     |
| 5     | Cu(OAc) <sub>2</sub>                 | K <sub>2</sub> CO <sub>3</sub>    | DMF     | 38                     |
| 6     | CuBr <sub>2</sub>                    | K <sub>2</sub> CO <sub>3</sub>    | DMF     | 68                     |
| 7     | CuSO <sub>4</sub> •5H <sub>2</sub> O | K <sub>2</sub> CO <sub>3</sub>    | DMF     | 58                     |
| 8     | Cu(acac) <sub>2</sub>                | K <sub>2</sub> CO <sub>3</sub>    | DMF     | 23                     |
| 9     | CuI                                  | NaOH                              | DMF     | 50                     |
| 10    | CuI                                  | NaF                               | DMF     | ND                     |
| 11    | CuI                                  | NaHCO <sub>3</sub>                | DMF     | ND                     |
| 12    | CuI                                  | Na <sub>2</sub> CO <sub>3</sub>   | DMF     | ND                     |
| 13    | CuI                                  | Cs <sub>2</sub> CO <sub>3</sub>   | DMF     | 32                     |
| 14    | CuI                                  | N(C <sub>2</sub> H <sub>5</sub> ) | DMF     | ND                     |

[a] Reaction conditions: CuI (1mol%), L<sub>11</sub> (4 mol%), aryl iodide (0.5 mmol), alkyne (0.6 mmol), K<sub>2</sub>CO<sub>3</sub> (0.5 mmol), 130 °C, 12 h, DMF (3 ml). [b] Yield was determined by <sup>1</sup>H NMR.

### 3. Cu-catalyzed decarboxylative coupling of alkynylcarboxylic acid with 4-iodoanisole

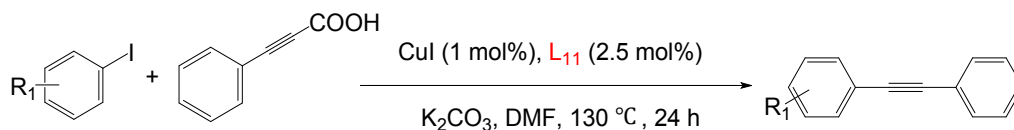

To a mixture of Cu salt (0.005 mmol), aryl iodide (0.5 mmol), K<sub>2</sub>CO<sub>3</sub> (0.5mmol, 0.0680 g), L<sub>11</sub> (0.0125 mmol) in a Schlenk tube, DMF (3.0 ml) was transferred via cannula. And then, alkynylcarboxylic acid (0.5 mmol, 0.073 g) are added dropwise. The reaction is stirred under nitrogen atmosphere at 130°C for 24 h. After that, the mixture was poured into water (50 ml). And then, the mixture was extracted with ethyl acetate (3×15 ml). The organic phase was washed with saturation sodium chloride (15 ml). After drying by anhydrous MgSO<sub>4</sub> and evaporating solvent, the brown residue dried in vacuum for at least 24 h. The crude product dissolved in CDCl<sub>3</sub> (0.5 ml). The yields were isolated by column chromatography .

#### 4. Characterization of products

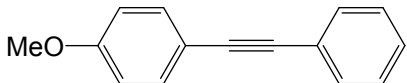

##### **1-methoxy-4-(phenylethynyl)benzene**

$^1\text{H}$  NMR (400 MHz,  $\text{CDCl}_3$ )  $\delta$  7.55 (dd,  $J = 7.7, 1.7$  Hz, 2H), 7.51 (d,  $J = 8.8$  Hz, 2H), 7.36 (d,  $J = 7.4$  Hz, 3H), 6.90 (d,  $J = 8.8$  Hz, 2H), 3.83 (s, 3H).  $^{13}\text{C}$  NMR (101 MHz,  $\text{CDCl}_3$ )  $\delta$  159.69, 133.10, 131.50, 128.36, 127.97, 123.67, 115.44, 114.06, 89.46, 88.14, 55.30.

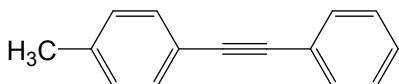

##### **1-methyl-4-(phenylethynyl)benzene**

$^1\text{H}$  NMR (400 MHz,  $\text{CDCl}_3$ )  $\delta$  7.55 – 7.53 (m, 2H), 7.45 (d,  $J = 7.9$  Hz, 2H), 7.35 (d,  $J = 6.5$  Hz, 3H), 7.17 (d,  $J = 7.9$  Hz, 2H), 2.38 (s, 3H).  $^{13}\text{C}$  NMR (101 MHz,  $\text{CDCl}_3$ )  $\delta$  139.82, 132.99, 132.94, 130.56, 129.75, 129.51, 124.93, 121.64, 91.00, 90.16, 22.94.

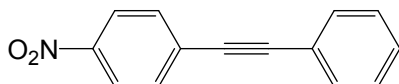

##### **1-nitro-4-(phenylethynyl)benzene**

$^1\text{H}$  NMR (400 MHz,  $\text{CDCl}_3$ )  $\delta$  8.22 (d,  $J = 8.8$  Hz, 2H), 7.67 (d,  $J = 8.8$  Hz, 2H), 7.57 (dd,  $J = 6.5, 3.1$  Hz, 2H), 7.39 (dd,  $J = 5.1, 1.8$  Hz, 3H).  $^{13}\text{C}$  NMR (101 MHz,  $\text{CDCl}_3$ )  $\delta$  148.40, 133.71, 133.29, 131.69, 130.73, 129.99, 125.08, 123.53, 96.15, 89.00.

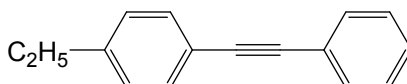

##### **1-ethyl-4-(phenylethynyl)benzene**

$^1\text{H}$  NMR (400 MHz,  $\text{CDCl}_3$ )  $\delta$  7.65 – 7.57 (m, 2H), 7.52 (d,  $J = 8.1$  Hz, 2H), 7.38 (d,  $J = 6.8$  Hz, 3H), 7.23 (d,  $J = 7.9$  Hz, 2H), 2.71 (q,  $J = 7.6$  Hz, 2H), 1.30 (t,  $J = 7.6$  Hz, 3H).  $^{13}\text{C}$  NMR (101 MHz,  $\text{CDCl}_3$ )  $\delta$  146.16, 133.10, 133.05, 129.81, 129.56, 129.42, 125.02, 121.95, 91.13, 90.25, 30.33, 16.83.

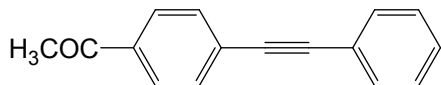

**1-(4-(phenylethynyl)phenyl) ethanone**

$^1\text{H}$  NMR (400 MHz,  $\text{CDCl}_3$ )  $\delta$  7.94 (d,  $J = 8.5$  Hz, 2H), 7.61 (d,  $J = 8.4$  Hz, 2H), 7.58 – 7.53 (m, 2H), 7.41 – 7.34 (m, 3H), 2.62 (s, 3H).  $^{13}\text{C}$  NMR (101 MHz,  $\text{CDCl}_3$ )  $\delta$  198.76, 137.61, 133.19, 133.14, 130.27, 129.90, 129.72, 129.63, 124.08, 94.16, 90.06, 28.07.

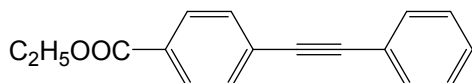

**1-ethyl-4-(phenylethynyl)benzoate**

$^1\text{H}$  NMR (400 MHz,  $\text{CDCl}_3$ )  $\delta$  8.03 (d,  $J = 8.4$  Hz, 2H), 7.59 (d,  $J = 8.4$  Hz, 2H), 7.55 (dd,  $J = 6.6, 3.0$  Hz, 2H), 7.40 – 7.34 (m, 3H), 4.39 (q,  $J = 7.1$  Hz, 2H), 1.41 (t,  $J = 7.1$  Hz, 3H).  $^{13}\text{C}$  NMR (101 MHz,  $\text{CDCl}_3$ )  $\delta$  150.32, 134.51, 133.93, 133.06, 130.62, 129.97, 129.83, 124.28, 123.54, 122.29, 91.62, 89.32, 54.82, 15.56.

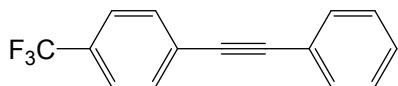

**1-(phenylethynyl)-4-(trifluoromethyl)benzene**

$^1\text{H}$  NMR (400 MHz,  $\text{CDCl}_3$ )  $\delta$  7.63 (d,  $J = 8.7$  Hz, 2H), 7.60 (d,  $J = 8.7$  Hz, 2H), 7.55 (dd,  $J = 6.1, 3.5$  Hz, 2H), 7.41 – 7.34 (m, 3H).  $^{13}\text{C}$  NMR (101 MHz,  $\text{CDCl}_3$ )  $\delta$  133.24, 133.18, 130.27, 129.89, 126.73, 126.69, 124.03, 123.99, 93.18, 89.40.

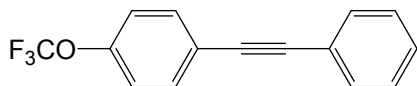

**1-(phenylethynyl)-4-(trifluoromethoxy)benzene**

$^1\text{H}$  NMR (400 MHz,  $\text{CDCl}_3$ )  $\delta$  7.55 (d,  $J = 8.8$  Hz, 2H), 7.54 – 7.51 (m, 2H), 7.38 – 7.34 (m, 3H), 7.20 (d,  $J = 8.1$  Hz, 2H).  $^{13}\text{C}$  NMR (101 MHz,  $\text{CDCl}_3$ )  $\delta$  150.31, 134.52, 133.06, 129.99, 129.84, 124.27, 123.53, 122.31, 91.62, 89.33.

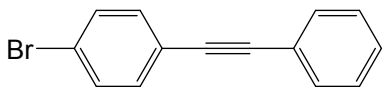

**1-bromo-4-(phenylethynyl)benzene**

$^1\text{H}$  NMR (400 MHz,  $\text{CDCl}_3$ )  $\delta$  7.52 (dd,  $J = 6.5, 2.9$  Hz, 2H), 7.48 (d,  $J = 8.4$  Hz, 2H), 7.39 (d,  $J = 8.4$  Hz, 2H), 7.37 – 7.33 (m, 3H).  $^{13}\text{C}$  NMR (101 MHz,  $\text{CDCl}_3$ )  $\delta$  133.03, 132.52, 131.63, 131.61, 129.21, 128.52, 128.45, 128.41, 122.95, 121.83, 90.53, 88.32.

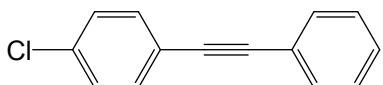

**1-chloro-4-(phenylethynyl)benzene**

$^1\text{H}$  NMR (400 MHz,  $\text{CDCl}_3$ )  $\delta$  7.52 (dd,  $J = 6.6, 3.0$  Hz, 2H), 7.46 (d,  $J = 8.4$  Hz, 2H), 7.38 – 7.29 (m, 5H).  $^{13}\text{C}$  NMR (101 MHz,  $\text{CDCl}_3$ )  $\delta$  132.81, 132.51, 131.6, 129.2, 128.7, 128.48, 128.44, 128.39, 121.83, 81.55.

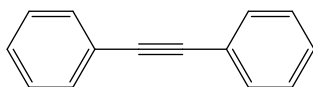

**2-diphenylethyne**

$^1\text{H}$  NMR (400 MHz,  $\text{CDCl}_3$ )  $\delta$  7.55 (dd,  $J = 7.0, 2.1$  Hz, 4H), 7.36 (d,  $J = 5.2$  Hz, 2H).  $^{13}\text{C}$  NMR (101 MHz,  $\text{CDCl}_3$ )  $\delta$  133.05, 129.78, 129.69, 124.73, 90.81.

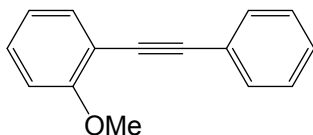

**1-methoxy-2-(phenylethynyl)benzene**

$^1\text{H}$  NMR (400 MHz,  $\text{CDCl}_3$ )  $\delta$  7.56 (dd,  $J = 7.5, 1.9$  Hz, 2H), 7.50 (dd,  $J = 7.6, 1.4$  Hz, 1H), 7.38 – 7.27 (m, 4H), 6.93 (dd,  $J = 17.3, 8.1$  Hz, 2H), 3.92 (s, 3H).  $^{13}\text{C}$  NMR (101 MHz,  $\text{CDCl}_3$ )  $\delta$  159.96, 133.59, 131.67, 129.74, 128.23, 128.09, 123.6, 120.5, 112.51, 110.75, 93.45, 85.72, 55.86.

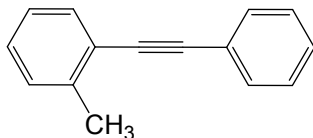

**1-methyl-2-(phenylethynyl)benzene**

$^1\text{H}$  NMR (400 MHz,  $\text{CDCl}_3$ )  $\delta$  7.61 (d,  $J = 6.9$  Hz, 2H), 7.57 (d,  $J = 7.5$  Hz, 1H), 7.41 (d,  $J = 6.5$  Hz, 3H), 7.29 (d,  $J = 4.2$  Hz, 2H), 7.23 (dt,  $J = 8.4, 4.3$  Hz, 1H), 2.59 (s, 3H).  $^{13}\text{C}$  NMR (101 MHz,  $\text{CDCl}_3$ )  $\delta$  140.17, 131.84, 131.51, 129.46, 128.35, 128.30, 128.16, 125.58, 123.58, 123.05, 93.37, 88.37, 20.73.

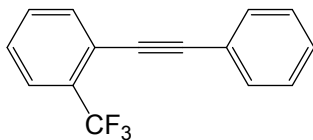

**1-trifluoromethyl -2-(phenylethynyl)benzene**

$^1\text{H}$  NMR (400 MHz,  $\text{CDCl}_3$ )  $\delta$  7.64 (t,  $J=7.5$ , 2H), 7.58-7.51 (m, 2H), 7.46 (t,  $J=7.6$ , 1H), 7.37 (d,  $J=8.0$ , 1H), 7.35-7.30 (m, 3H).  $^{13}\text{C}$  NMR (101 MHz,  $\text{CDCl}_3$ )  $\delta$  133.76, 131.75, 131.43, 128.87, 128.46, 127.96, 125.95, 125.90, 125.86, 122.82, 122.37, 121.65, 95.03, 85.45.

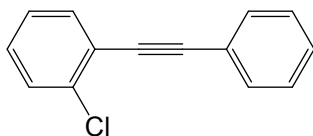

**1-chloro-2-(phenylethynyl)benzene**

$^1\text{H}$  NMR (400 MHz,  $\text{CDCl}_3$ )  $\delta$  7.61 (td,  $J = 8.0, 3.4$  Hz, 3H), 7.49 – 7.44 (m, 1H), 7.40 (dd,  $J = 4.9, 1.6$  Hz, 3H), 7.30 – 7.26 (m, 2H).  $^{13}\text{C}$  NMR (101 MHz,  $\text{CDCl}_3$ )  $\delta$  135.97, 133.24, 132.53, 131.77, 129.33, 129.27, 128.67, 128.47, 128.4, 126.48, 123.27, 122.96, 95.13, 92.14, 89.06.

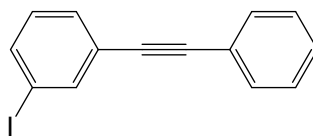

**1-iodo-3-(phenylethynyl)benzene**

$^1\text{H}$  NMR (400 MHz,  $\text{CDCl}_3$ )  $\delta$  7.90 (s, 1H), 7.67 (d,  $J = 7.9$  Hz, 1H), 7.56 – 7.47 (m, 3H), 7.39 – 7.34 (m, 3H), 7.08 (t,  $J = 7.8$  Hz, 1H).  $^{13}\text{C}$  NMR (101 MHz,  $\text{CDCl}_3$ )  $\delta$  141.58, 138.66, 133.09, 132.14, 131.28, 130.04, 129.84, 126.81, 124.21, 95.13, 92.14, 89.06.



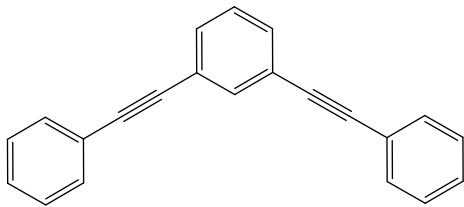

**1,3-bis(phenylethynyl)benzene**

$^1\text{H}$  NMR (400 MHz,  $\text{CDCl}_3$ )  $\delta$  7.72 (s, 1H), 7.55 (d,  $J = 4.3$  Hz, 2H), 7.53 (d,  $J = 2.0$  Hz, 2H), 7.50 (d,  $J = 1.4$  Hz, 1H), 7.48 (d,  $J = 1.5$  Hz, 1H), 7.38 – 7.32 (m, 7H).  $^{13}\text{C}$  NMR (101 MHz,  $\text{CDCl}_3$ )  $\delta$  136.04, 133.09, 132.71, 129.90, 129.88, 129.82, 125.07, 124.45, 91.39, 89.97.

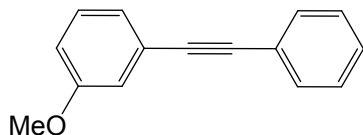

**1-methoxy-3-(phenylethynyl)benzene**

$^1\text{H}$  NMR (400 MHz,  $\text{CDCl}_3$ )  $\delta$  7.60 – 7.53 (m, 2H), 7.42 – 7.35 (m, 3H), 7.32 – 7.25 (m, 2H), 7.16 (d,  $J = 7.6$  Hz, 1H), 7.09 (s, 1H), 6.92 (dd,  $J = 8.3, 2.3$  Hz, 1H), 3.85 (s, 3H).  $^{13}\text{C}$  NMR (101 MHz,  $\text{CDCl}_3$ )  $\delta$  160.84, 133.06, 130.83, 129.77, 129.72, 125.69, 125.66, 117.77, 116.38, 90.79, 90.59, 56.73.

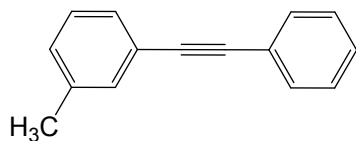

**1-methoxy-3-(phenylethynyl)benzene**

$^1\text{H}$  NMR (400 MHz,  $\text{CDCl}_3$ )  $\delta$  7.60 (dd,  $J = 7.4, 1.8$  Hz, 2H), 7.41 (dd,  $J = 11.4, 8.8$  Hz, 5H), 7.29 (t,  $J = 7.6$  Hz, 1H), 7.20 (d,  $J = 7.6$  Hz, 1H), 2.41 (s, 3H).  $^{13}\text{C}$  NMR (101 MHz,  $\text{CDCl}_3$ )  $\delta$  139.50, 133.70, 133.10, 130.67, 130.20, 129.83, 129.75, 129.67, 124.90, 124.59, 91.11, 90.57, 22.72.

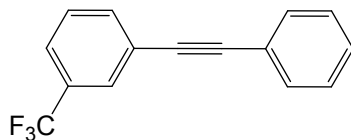

**1-(phenylethynyl)-3-(trifluoromethyl)benzene**

$^1\text{H}$  NMR (400 MHz,  $\text{CDCl}_3$ )  $\delta$  7.80 (s, 1H), 7.70 (d,  $J = 7.7$  Hz, 1H), 7.61 – 7.52 (m, 3H), 7.48 (t,  $J = 7.8$  Hz, 1H), 7.40 – 7.34 (m, 3H).  $^{13}\text{C}$  NMR (101 MHz,  $\text{CDCl}_3$ )  $\delta$  136.07, 133.13, 130.29, 130.17, 129.87, 126.19, 126.16, 125.70, 124.03, 92.32, 89.20.

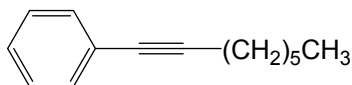

**oct-1-ynylbenzene**

$^1\text{H}$  NMR (400 MHz,  $\text{CDCl}_3$ )  $\delta$  7.46–7.31 (m, 2H), 7.37–7.17 (m, 3H), 2.52–2.31 (m, 2H), 1.51 (m, 2H), 1.53–1.36 (m, 2H), 1.33–1.21 (m, 4H), 0.90 (m, 3H).  $^{13}\text{C}$  NMR (101 MHz,  $\text{CDCl}_3$ )  $\delta$  143.46, 131.60, 131.56, 128.50, 128.34, 128.08, 123.59, 120.46, 89.67, 88.79, 35.92, 31.49, 30.96, 22.57, 14.05.

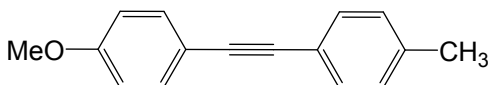

**1-methoxy-4-(p-tolylethynyl)benzene**

$^1\text{H}$  NMR (400 MHz,  $\text{CDCl}_3$ )  $\delta$  7.47 (d,  $J = 8.6$  Hz, 2H), 7.42 (d,  $J = 7.9$  Hz, 2H), 7.15 (d,  $J = 7.8$  Hz, 2H), 6.88 (d,  $J = 8.6$  Hz, 2H), 3.83 (s, 2H), 2.37 (s, 2H).  $^{13}\text{C}$  NMR (101 MHz,  $\text{CDCl}_3$ )  $\delta$  159.51, 138.03, 132.99, 131.36, 129.10, 120.53, 115.62, 113.99, 88.68, 88.22, 55.30, 21.49.

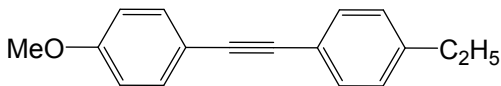

**1-ethyl-4-(4-ethyl-methoxyphenyl)ethynyl)benzene**

$^1\text{H}$  NMR (400 MHz,  $\text{CDCl}_3$ )  $\delta$  7.45 (dd,  $J = 12.3, 8.5$  Hz, 4H), 7.17 (d,  $J = 8.1$  Hz, 2H), 6.87 (d,  $J = 8.8$  Hz, 2H), 3.83 (s, 3H), 2.66 (q,  $J = 7.6$  Hz, 2H), 1.24 (t,  $J = 7.6$  Hz, 3H).  $^{13}\text{C}$  NMR (101 MHz,  $\text{CDCl}_3$ )  $\delta$  160.90, 145.76, 134.41, 132.85, 129.31, 122.16, 117.05, 115.35, 90.06, 89.64, 56.73, 30.24, 16.79

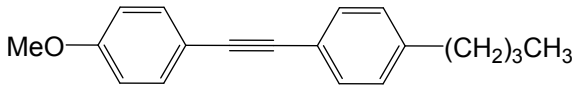

**1-butyl-4-((4-methoxyphenyl)ethynyl)benzene**

$^1\text{H}$  NMR (400 MHz,  $\text{CDCl}_3$ )  $\delta$  7.46 (d,  $J = 8.7$  Hz, 2H), 7.42 (d,  $J = 8.0$  Hz, 2H), 7.15 (d,  $J = 8.0$  Hz, 2H), 6.87 (d,  $J = 8.7$  Hz, 2H), 3.83 (s, 3H), 2.67 – 2.57 (m, 2H), 1.59 (dd,  $J = 15.3, 7.8$  Hz, 2H), 1.36 (dd,  $J =$

14.9, 7.4 Hz, 2H), 0.93 (t,  $J = 7.3$  Hz, 3H).  $^{13}\text{C}$  NMR (101 MHz,  $\text{CDCl}_3$ )  $\delta$  159.49, 143.04, 132.98, 131.35, 128.43, 120.71, 115.66, 113.97, 88.65, 88.24, 55.3, 35.58, 33.41, 22.31, 13.93.

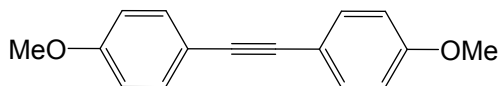

**1,2-bis(4-methoxyphenyl)ethyne**

$^1\text{H}$  NMR (400 MHz,  $\text{CDCl}_3$ )  $\delta$  7.46 (d,  $J = 8.6$  Hz, 4H), 6.87 (d,  $J = 8.7$  Hz, 4H), 3.82 (s, 6H).  $^{13}\text{C}$  NMR (101 MHz,  $\text{CDCl}_3$ )  $\delta$  159.41, 132.89, 124.40, 115.74, 113.98, 87.97, 55.29.

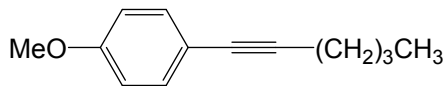

**1-(hex-1-ynyl)-4-methoxybenzene**

$^1\text{H}$  NMR (400 MHz,  $\text{CDCl}_3$ )  $\delta$  7.33 (d,  $J = 8.7$  Hz, 2H), 6.81 (d,  $J = 8.7$  Hz, 2H), 3.79 (s, 2H), 2.38 (t,  $J = 7.1$  Hz, 1H), 1.64 – 1.55 (m, 1H), 1.51 – 1.40 (m, 1H), 1.32 (d,  $J = 3.4$  Hz, 3H), 0.91 (t,  $J = 6.8$  Hz, 2H).

$^{13}\text{C}$  NMR (101 MHz,  $\text{CDCl}_3$ )  $\delta$  158.97, 132.84, 116.30, 113.80, 88.81, 80.22, 55.24, 31.39, 28.86, 28.62, 22.57, 19.42, 14.06.

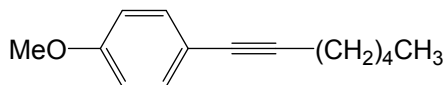

**1-(hept-1-ynyl)-4-methoxybenzene**

$^1\text{H}$  NMR (400 MHz,  $\text{CDCl}_3$ )  $\delta$  7.35 (d,  $J = 8.8$  Hz, 2H), 6.82 (d,  $J = 8.8$  Hz, 2H), 3.79 (s, 2H), 2.40 (t,  $J = 7.1$  Hz, 1H), 1.68 – 1.56 (m, 1H), 1.42 (dddt,  $J = 28.8, 21.5, 14.5, 7.2$  Hz, 2H), 0.94 (t,  $J = 7.2$  Hz, 2H).

$^{13}\text{C}$  NMR (101 MHz,  $\text{CDCl}_3$ )  $\delta$  159.01, 132.85, 116.35, 113.81, 88.78, 80.27, 55.19, 31.17, 28.62, 22.27, 19.40, 14.00.

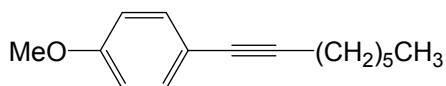

**1-methoxy-4-(oct-1-ynyl)benzene**

$^1\text{H}$  NMR (400 MHz,  $\text{CDCl}_3$ ).  $^1\text{H}$  NMR (400 MHz,  $\text{CDCl}_3$ )  $\delta$  7.32 (d,  $J = 8.8$ , 2H), 6.80 (d,  $J = 8.9$ , 2H), 3.79 (s, 3H), 2.38 (t,  $J = 7.1$ , 2H), 1.58 (dd,  $J = 12.2, 4.8$ , 2H), 1.49-1.40 (m, 2H), 1.33-1.30 (m, 4H), 0.90 (t,

$J=7.0$ , 3H).  $^{13}\text{C}$  NMR (101 MHz,  $\text{CDCl}_3$ )  $\delta$  159.01, 132.85, 116.35, 113.81, 88.78, 80.27, 55.20, 31.41, 28.89, 28.64, 22.59, 19.43, 14.06.

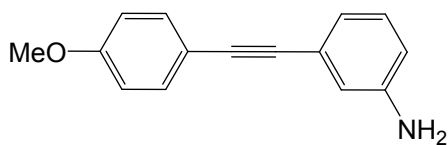

**3-((4-methoxyphenyl)ethynyl)aniline**

$^1\text{H}$  NMR (400 MHz,  $\text{CDCl}_3$ )  $\delta$  7.45 (d,  $J = 8.8$  Hz, 2H), 7.12 (t,  $J = 7.8$  Hz, 1H), 6.92 (d,  $J = 7.6$  Hz, 1H), 6.90 – 6.82 (m, 2H), 6.64 (dd,  $J = 8.0$ , 1.6 Hz, 1H), 5.29 (s, 1H), 3.82 (s, 2H).  $^{13}\text{C}$  NMR (101 MHz,  $\text{CDCl}_3$ )  $\delta$  160.98, 147.68, 134.48, 130.69, 125.68, 123.39, 119.15, 116.90, 116.52, 115.41, 90.21, 89.71, 56.73, 54.

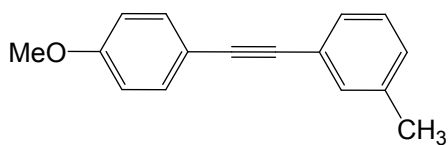

**1-((4-methoxyphenyl)ethynyl)-3-methylbenzene**

$^1\text{H}$  NMR (400 MHz,  $\text{CDCl}_3$ )  $\delta$  7.46 (d,  $J = 8.7$  Hz, 2H), 7.37 – 7.28 (m, 2H), 7.22 (t,  $J = 7.6$  Hz, 1H), 7.13 (d,  $J = 7.6$  Hz, 1H), 6.88 (d,  $J = 8.7$  Hz, 2H), 3.83 (s, 3H), 2.35 (s, 3H).  $^{13}\text{C}$  NMR (101 MHz,  $\text{CDCl}_3$ )  $\delta$  159.58, 137.96, 133.03, 132.04, 128.84, 128.53, 128.2, 123.4, 115.52, 113.99, 89.01, 88.23, 55.3, 21.24.

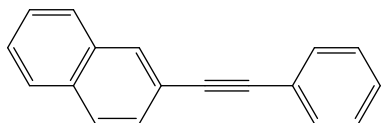

**2-(phenylethynyl)naphthalene**

$^1\text{H}$  NMR (400 MHz,  $\text{CDCl}_3$ )  $\delta$  8.52 (d,  $J = 8.3$  Hz, 1H), 7.94 – 7.85 (m, 2H), 7.83 (d,  $J = 7.1$  Hz, 1H), 7.76 – 7.69 (m, 2H), 7.65 (t,  $J = 7.5$  Hz, 1H), 7.58 (t,  $J = 7.4$  Hz, 1H), 7.50 (t,  $J = 7.7$  Hz, 1H), 7.44 (d,  $J = 7.6$  Hz, 3H).  $^{13}\text{C}$  NMR (101 MHz,  $\text{CDCl}_3$ )  $\delta$  133.31, 133.25, 131.69, 130.39, 128.78, 128.45, 128.4, 128.34, 126.8, 126.45, 126.25, 125.3, 123.45, 120.94, 94.37, 87.59.

### 5. <sup>1</sup>H NMR and <sup>13</sup>C NMR spectra of alkynes

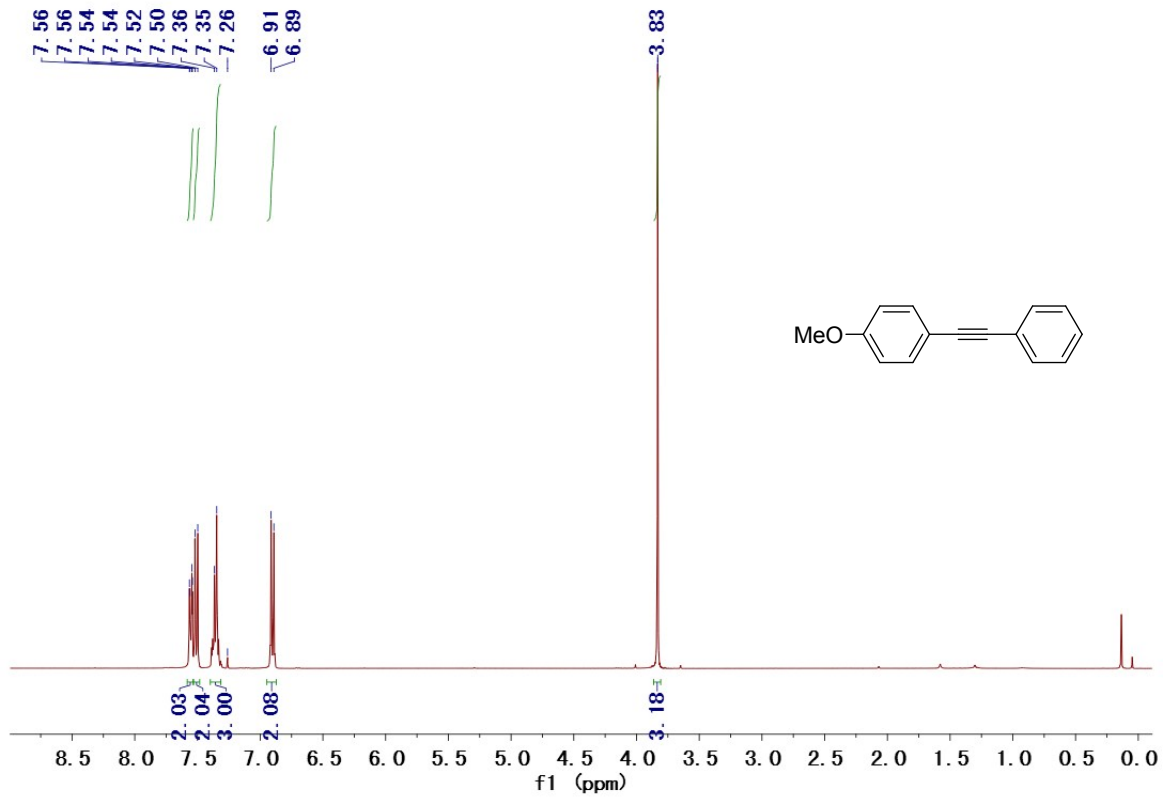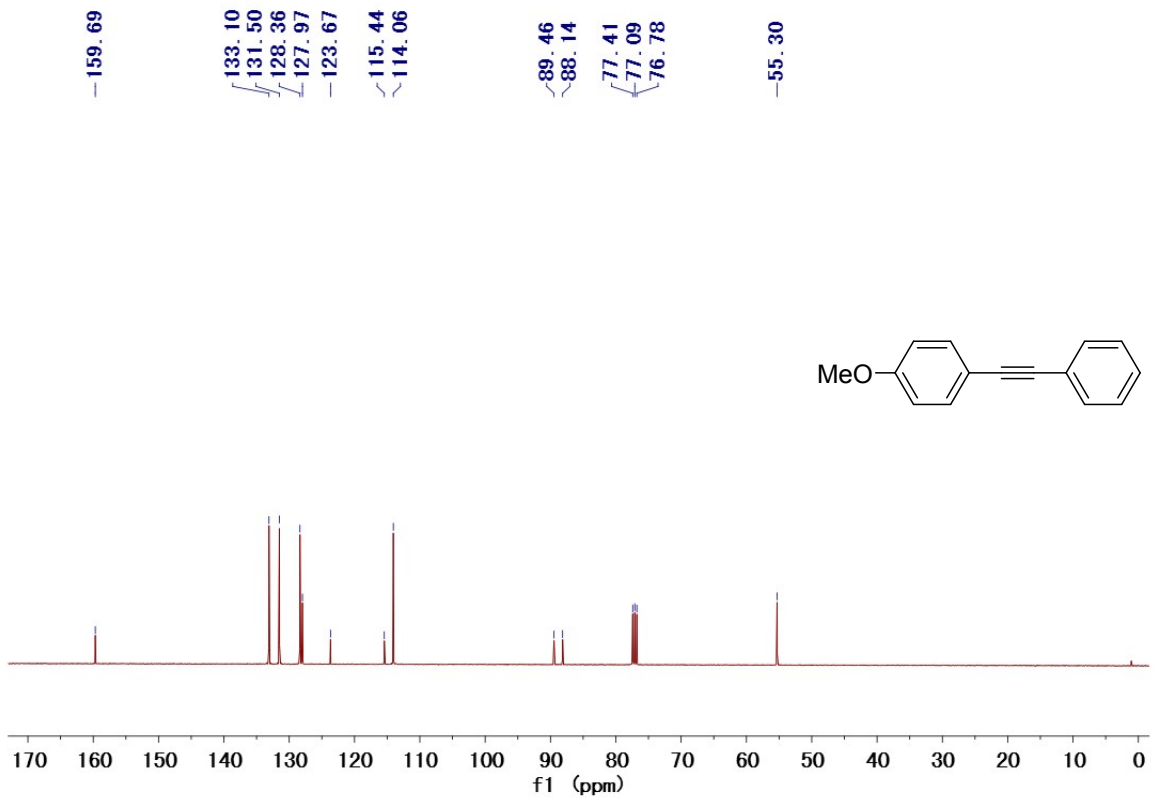

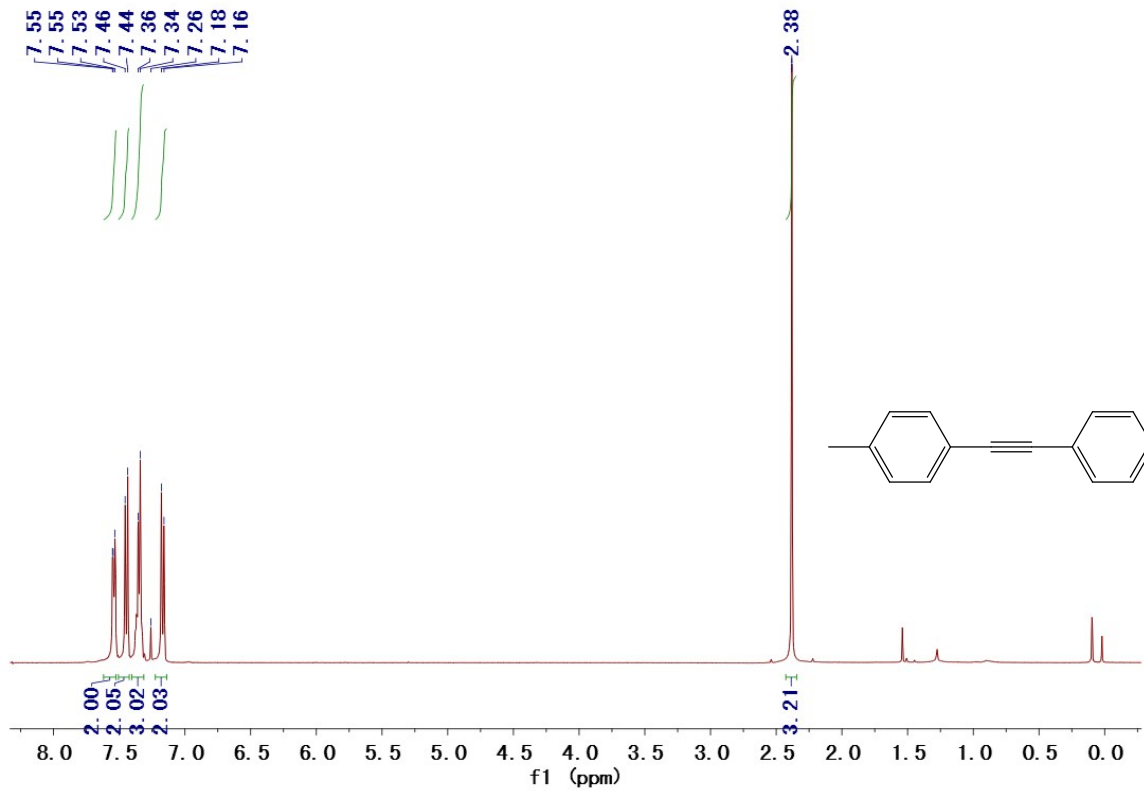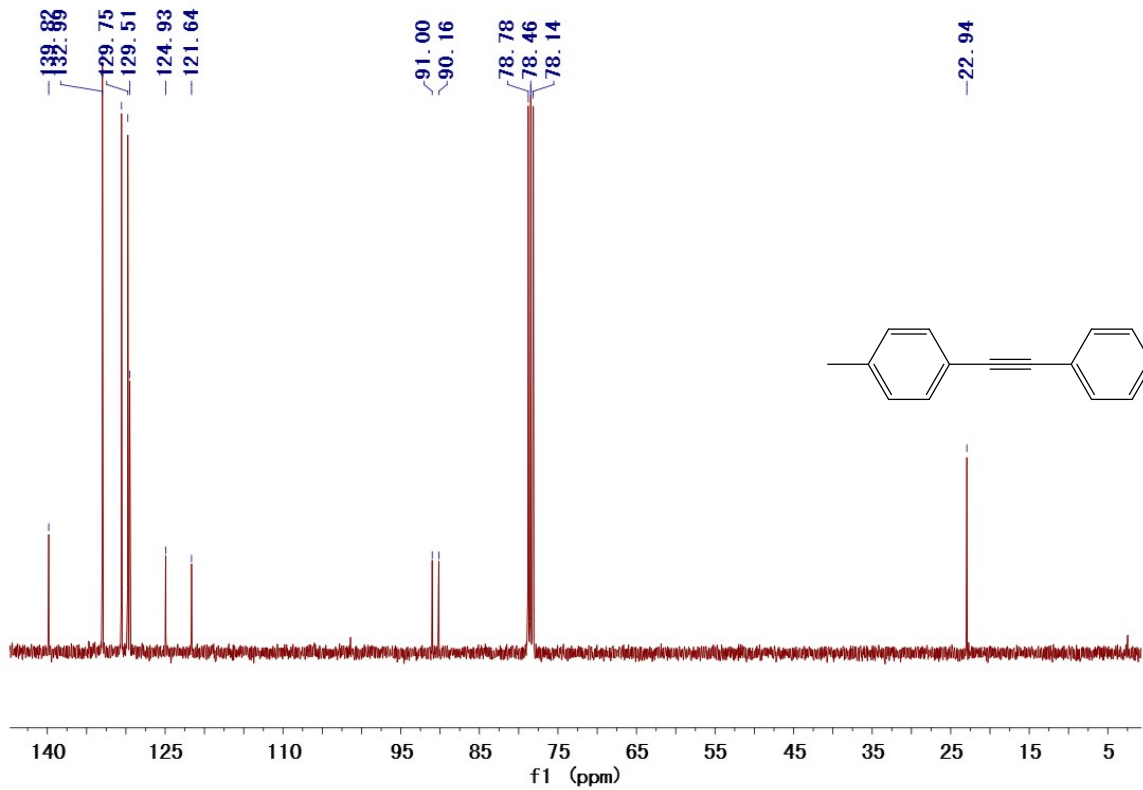

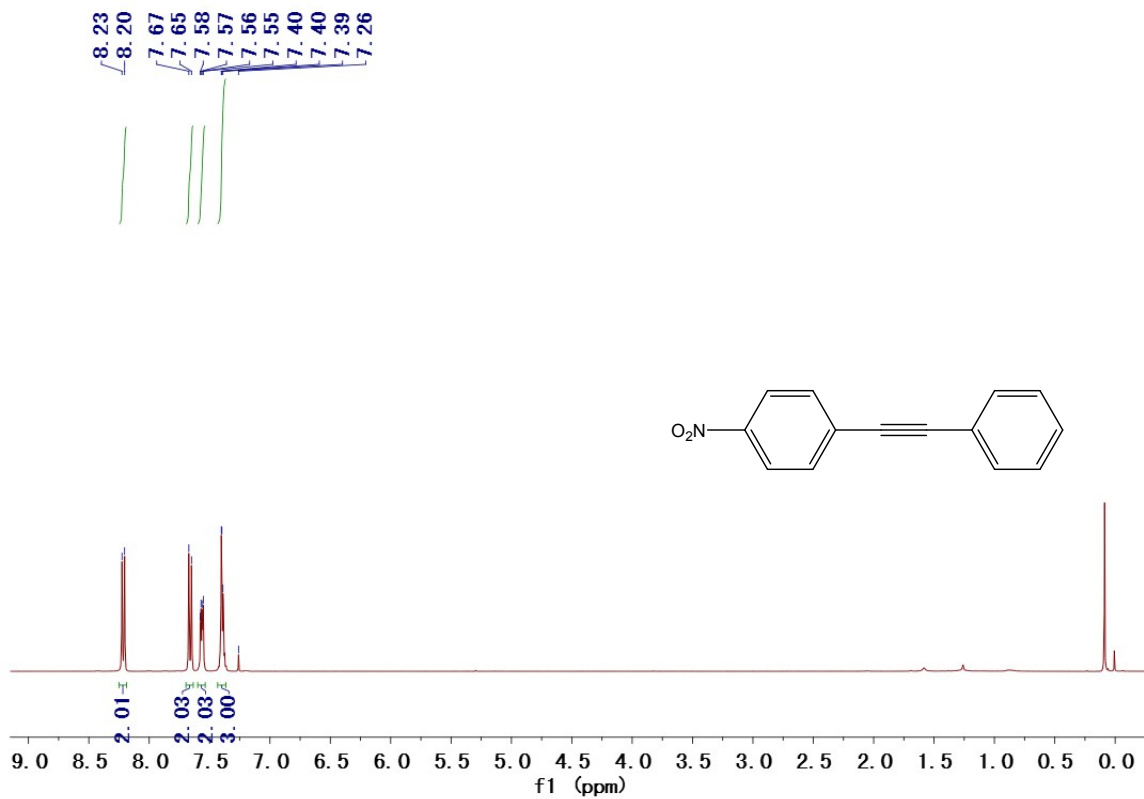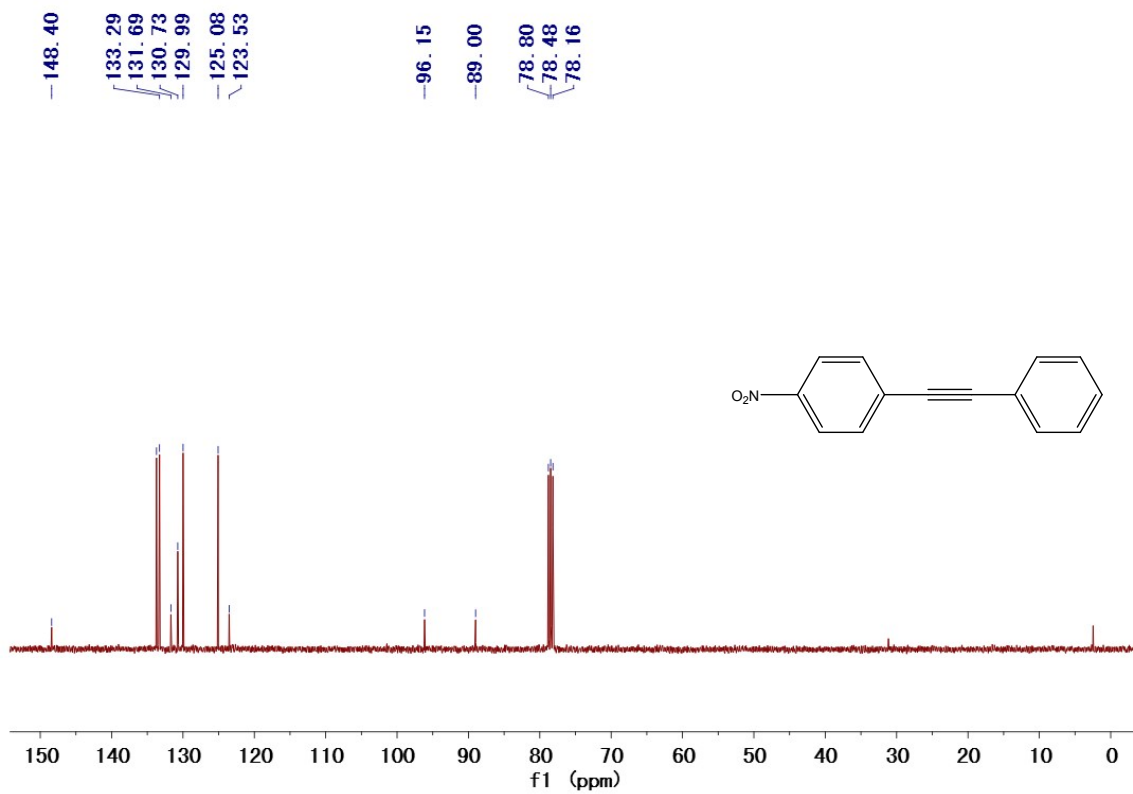

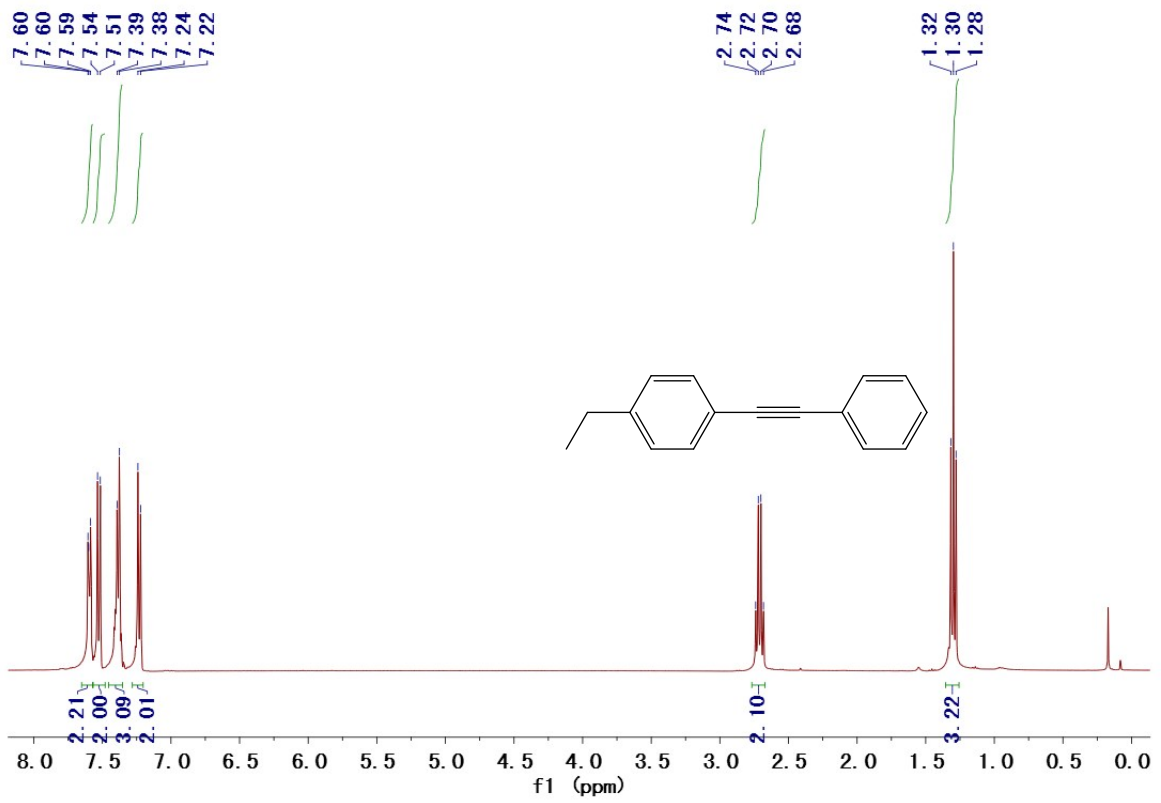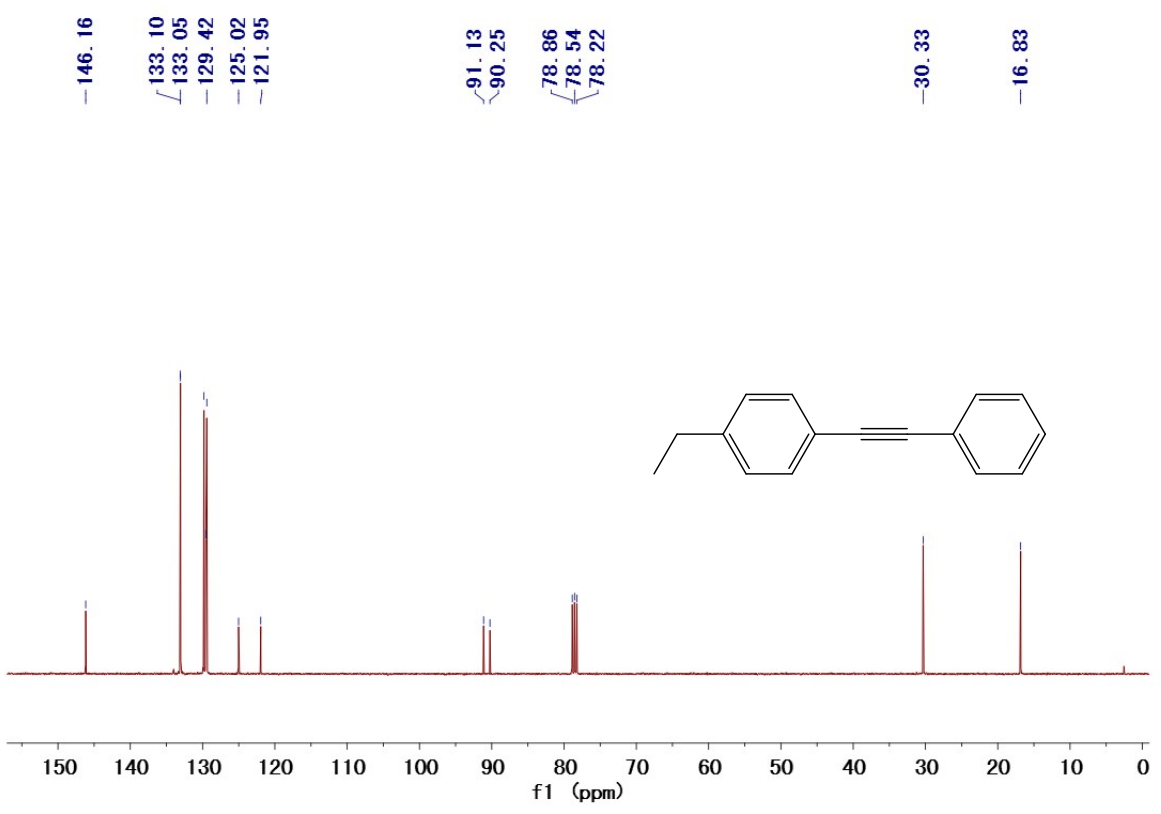



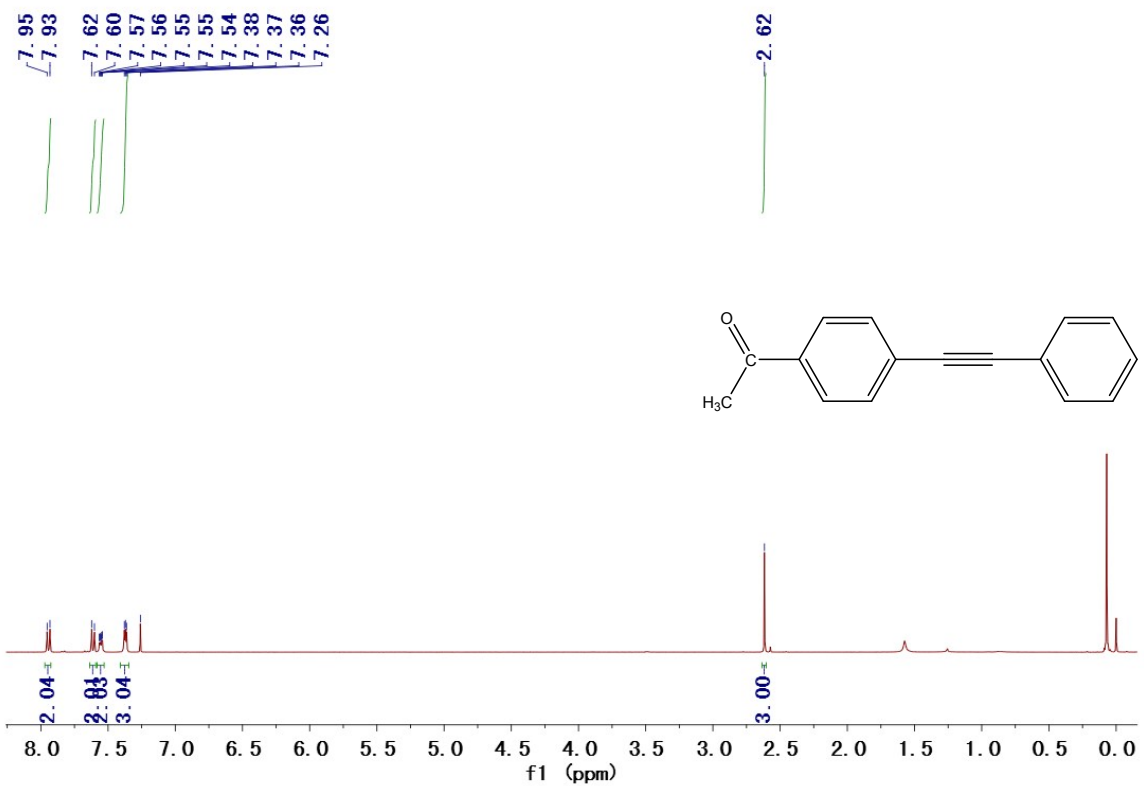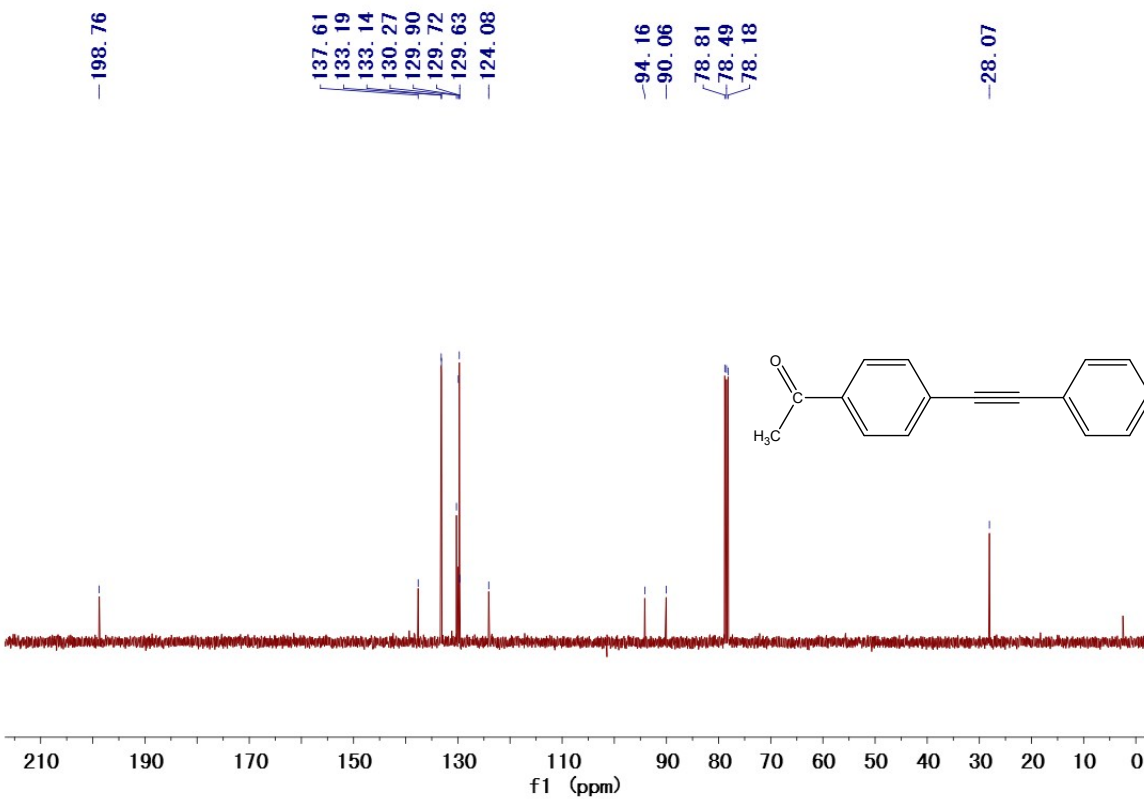

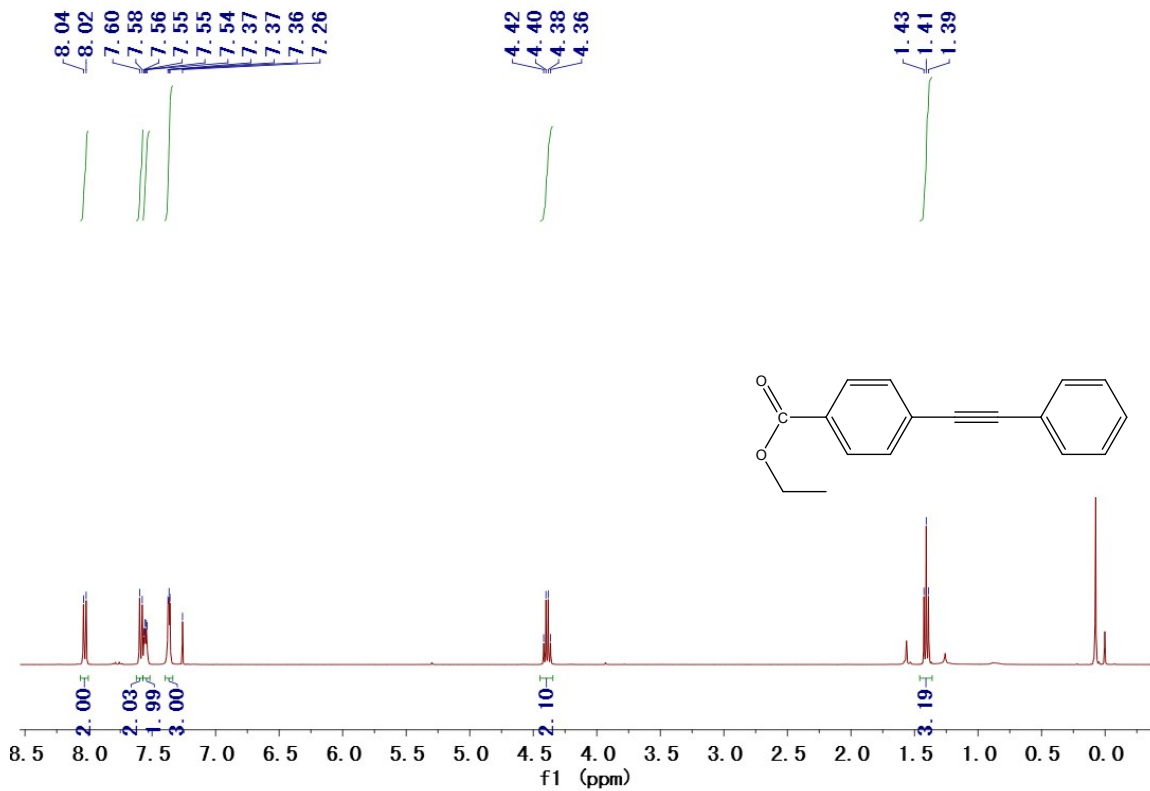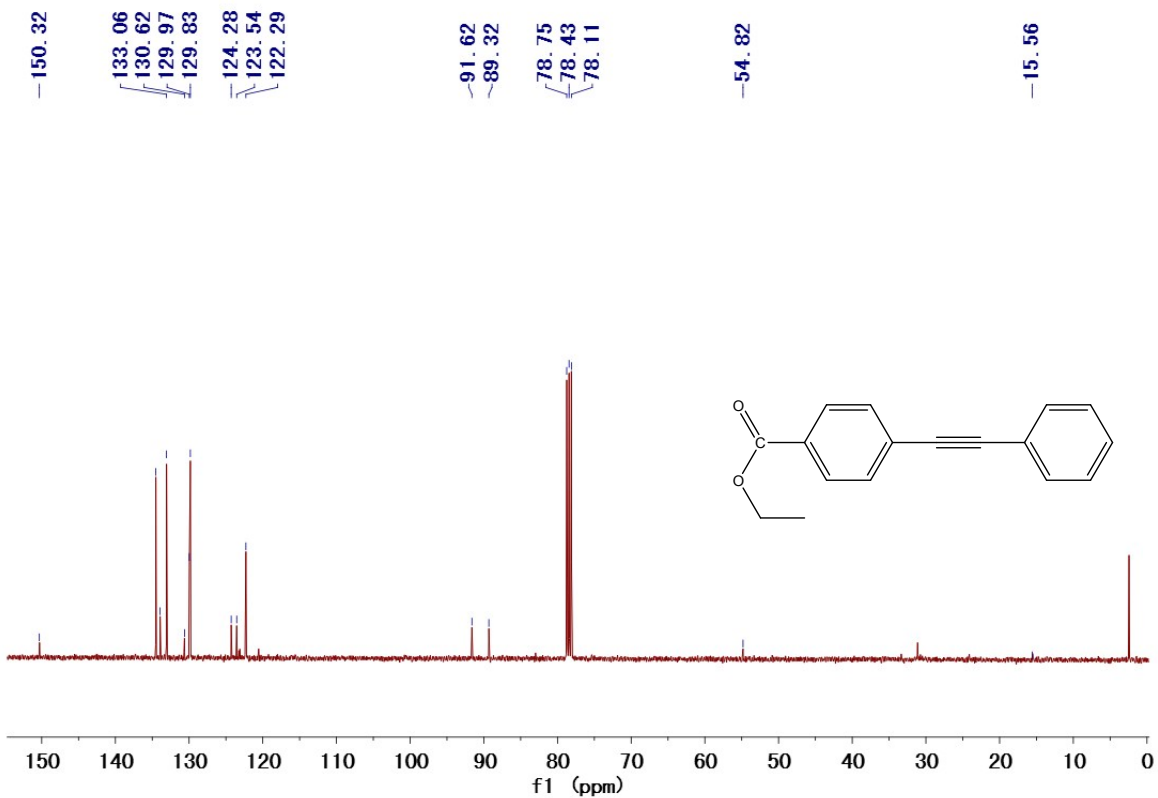

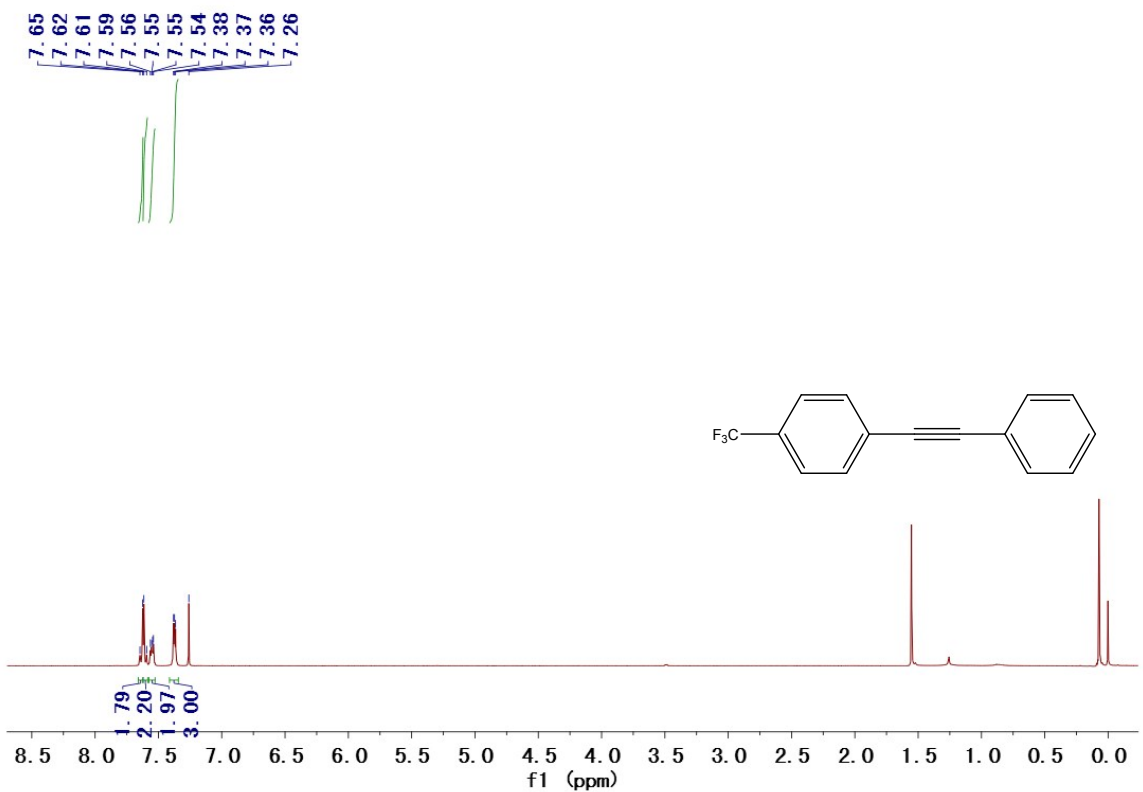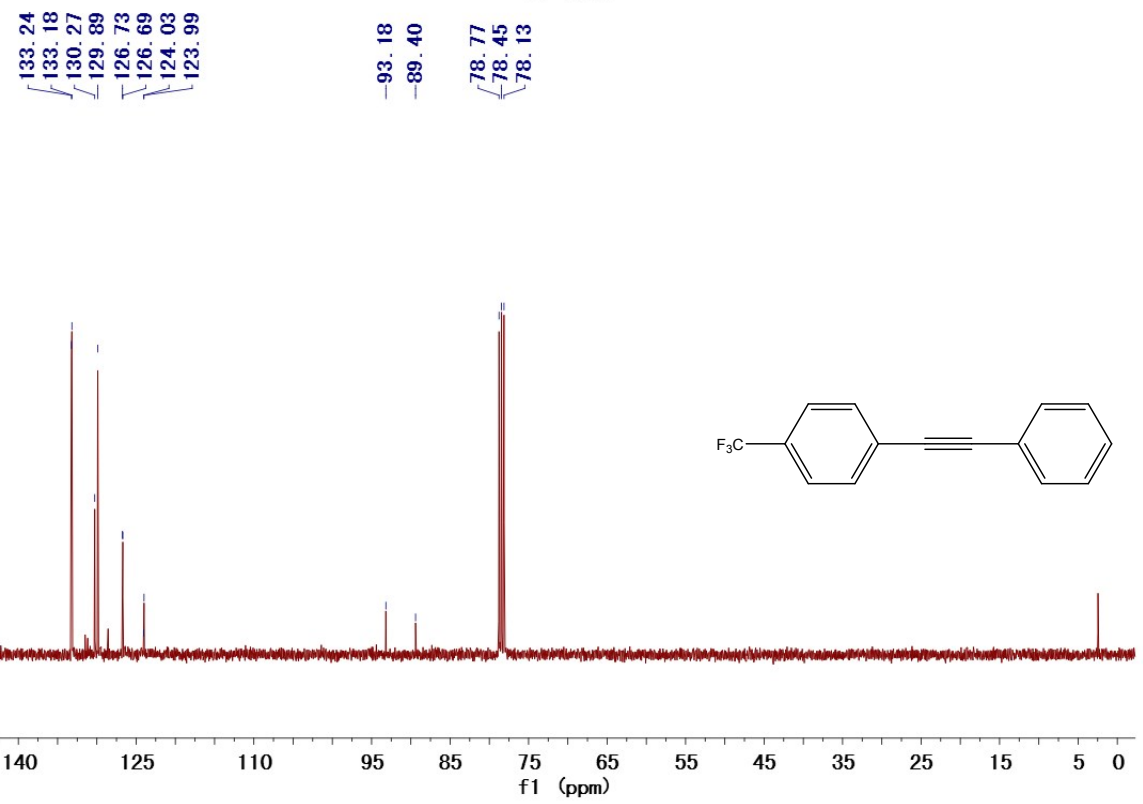

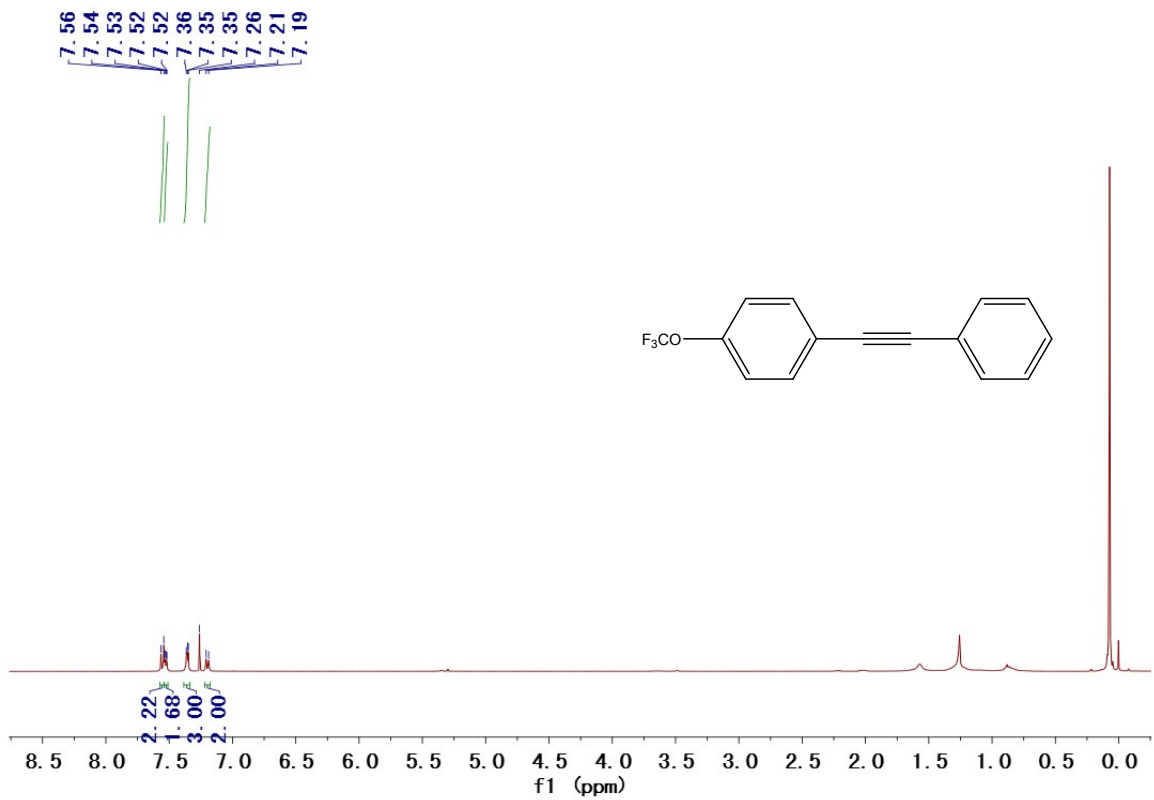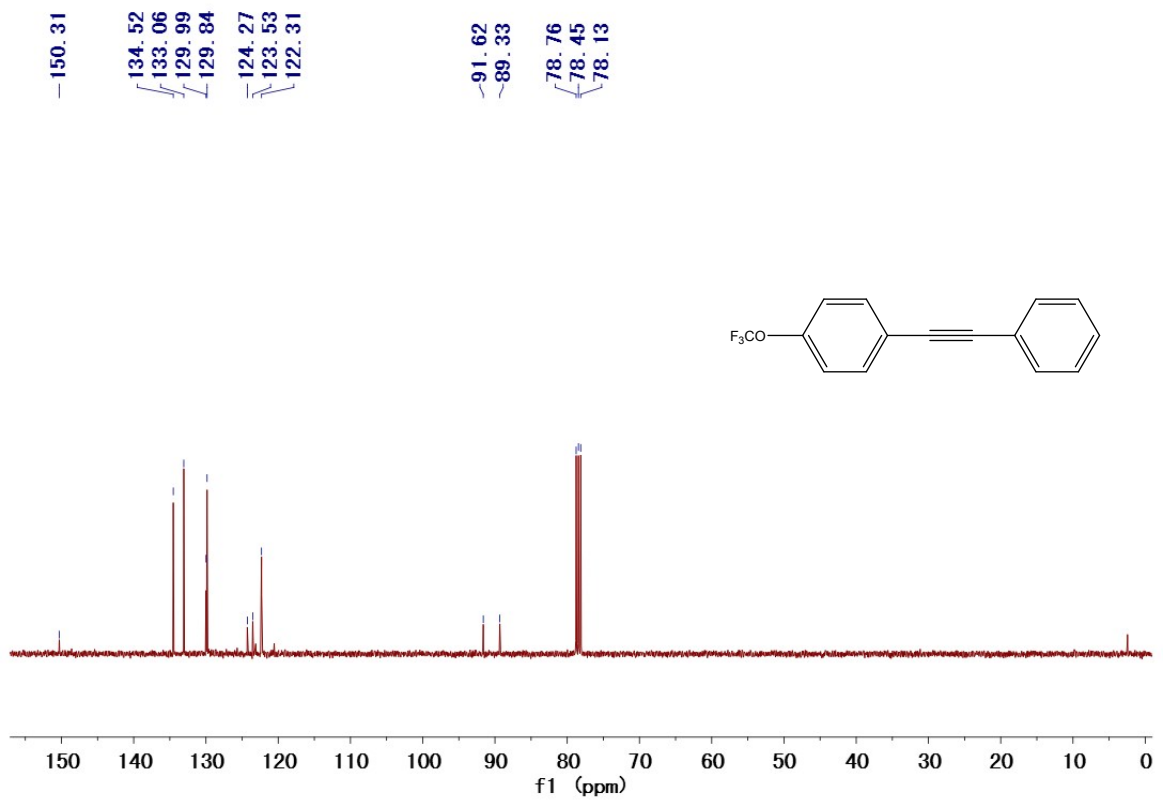

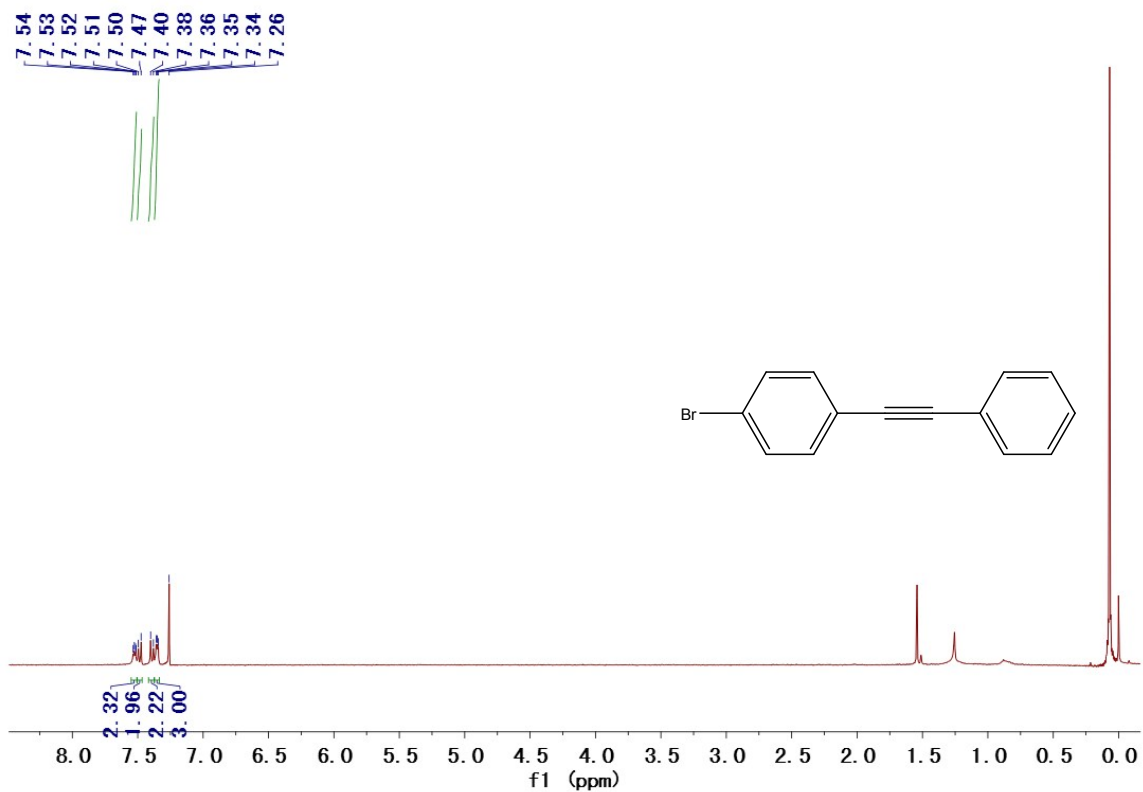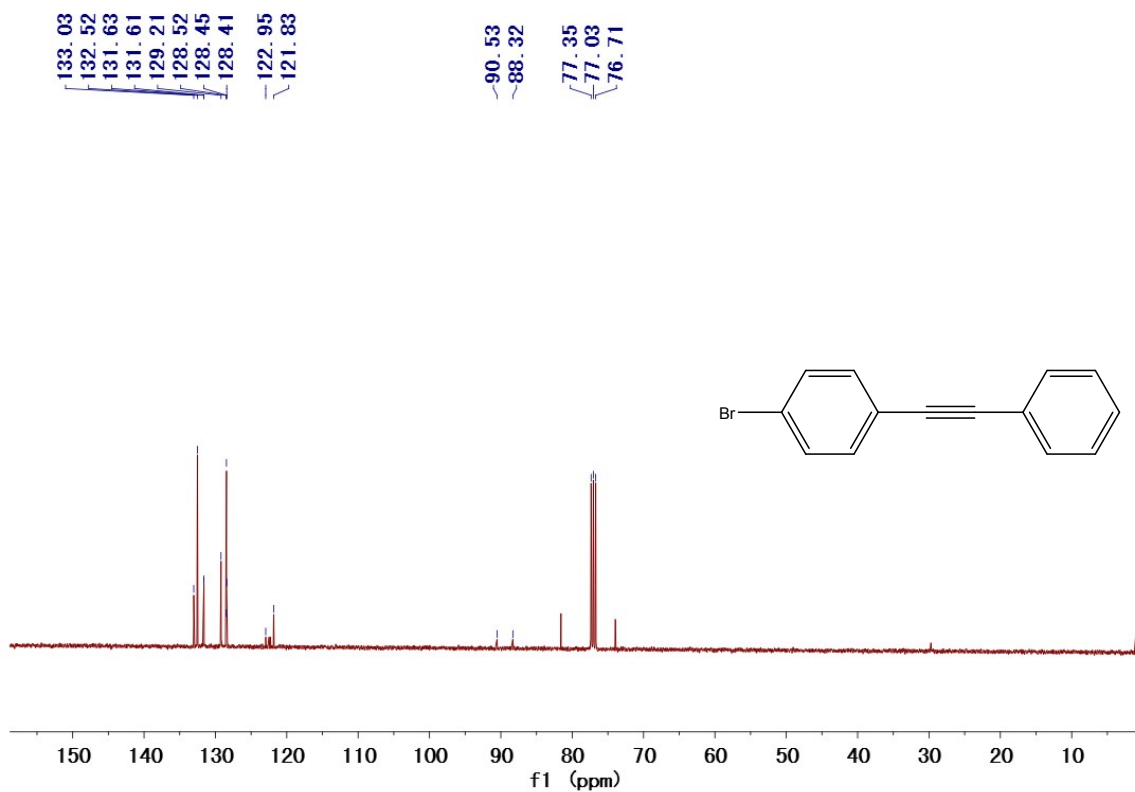

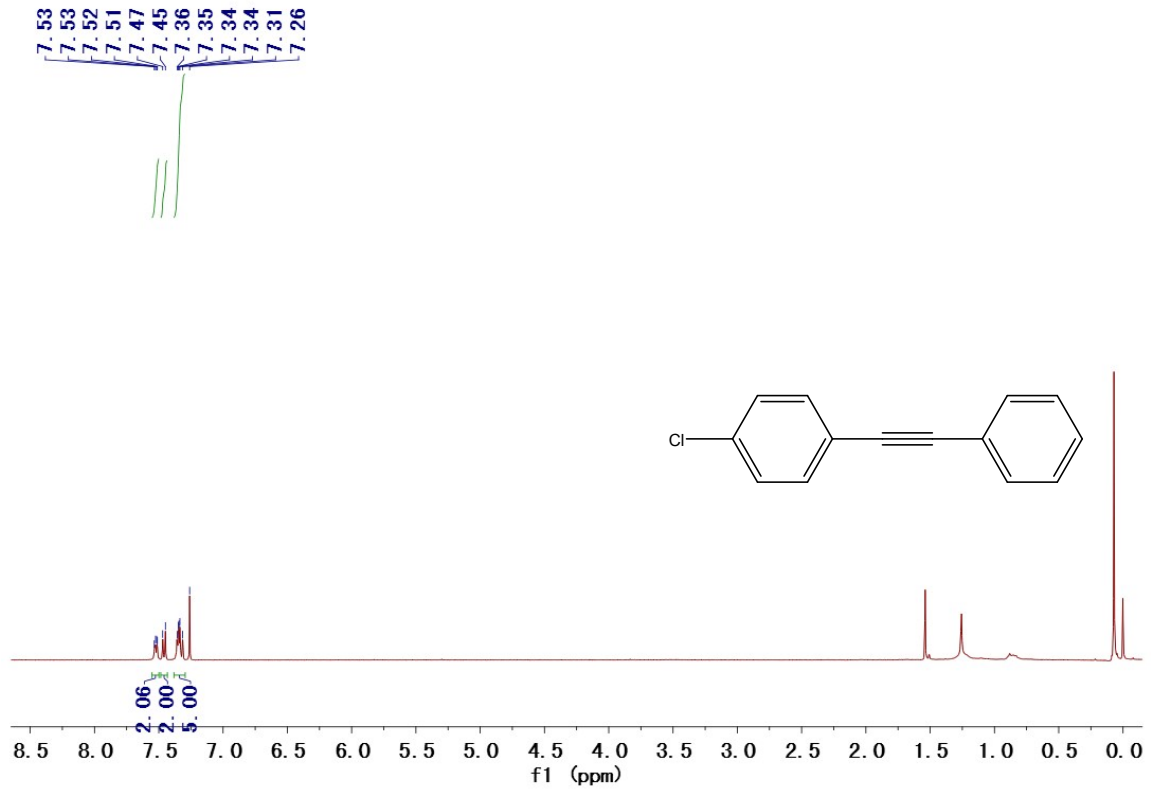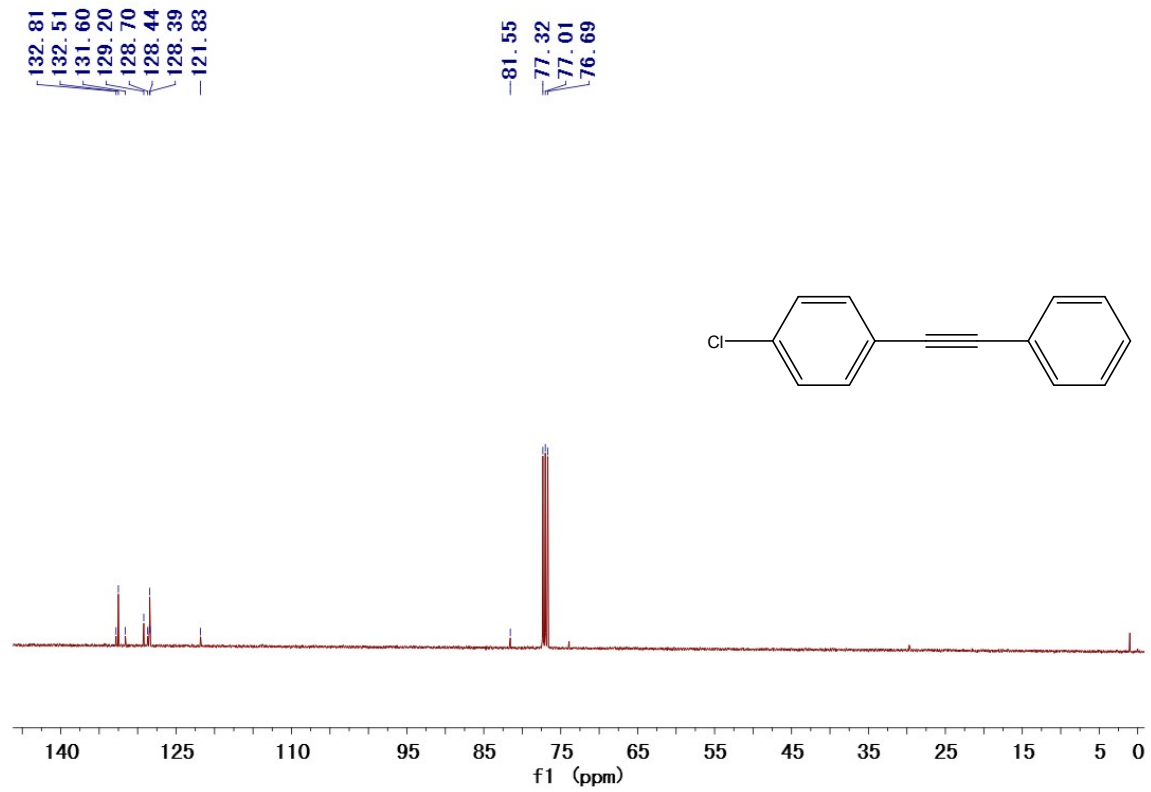

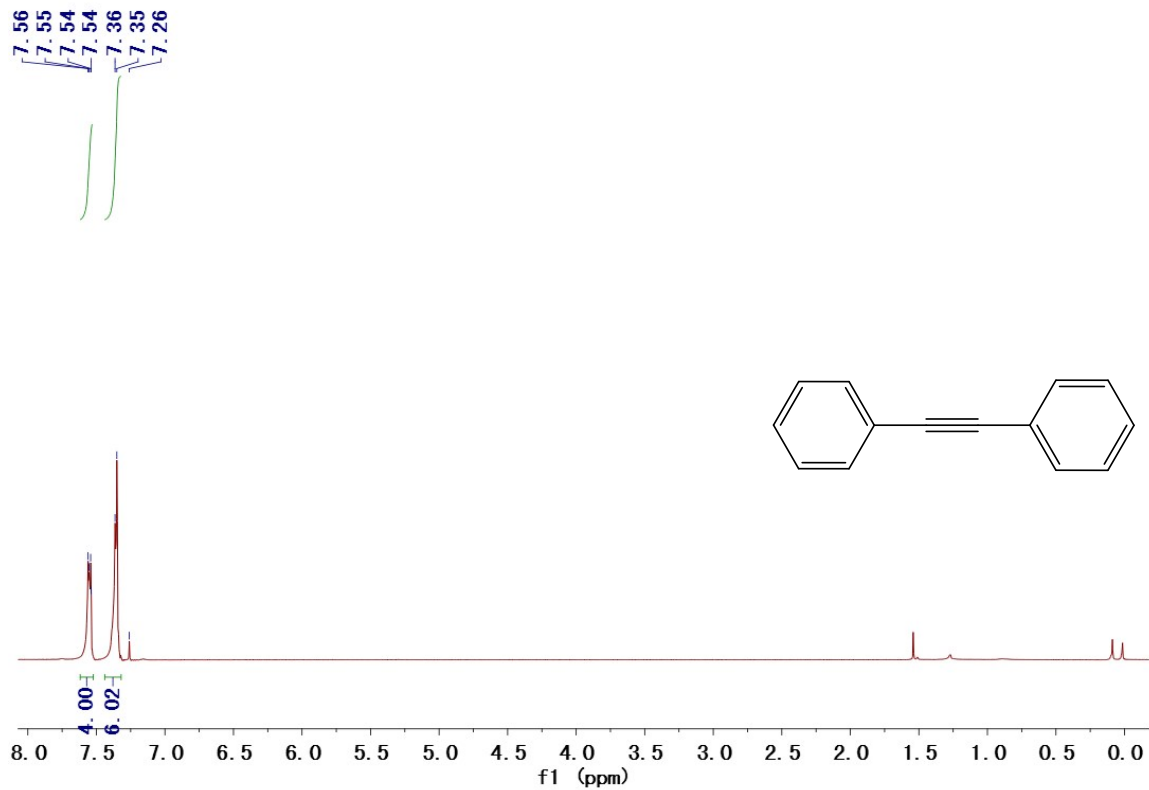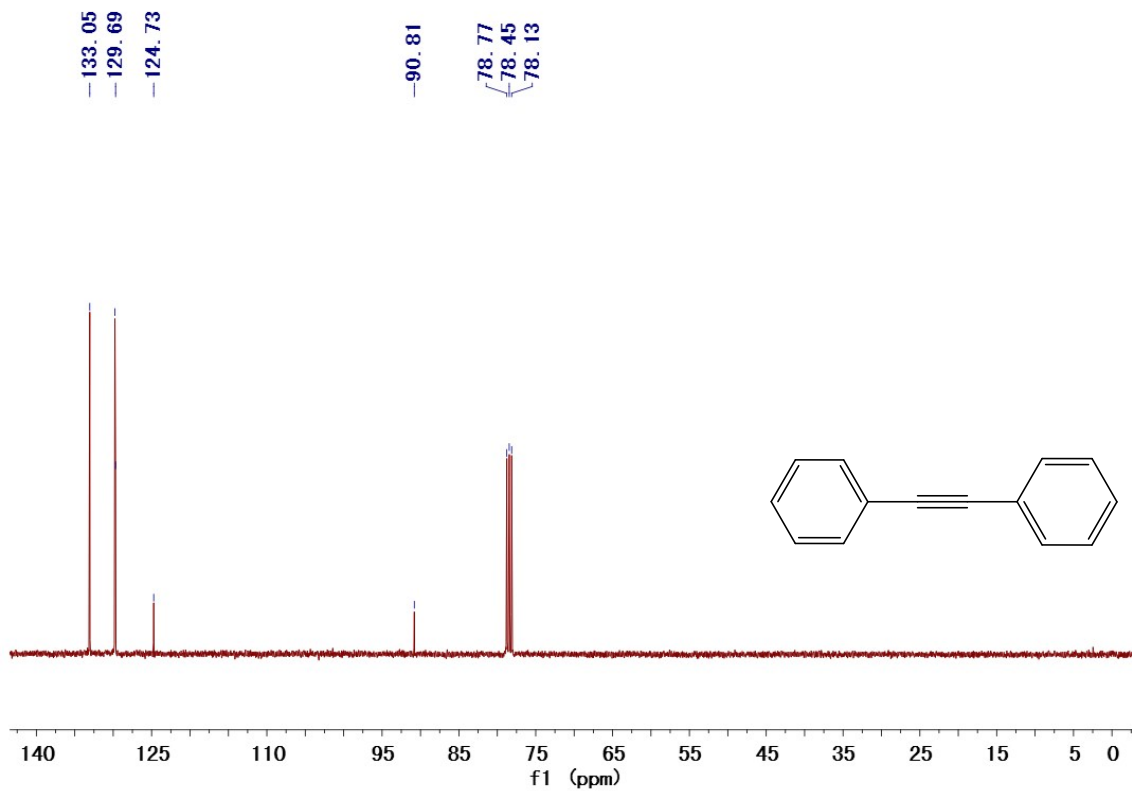

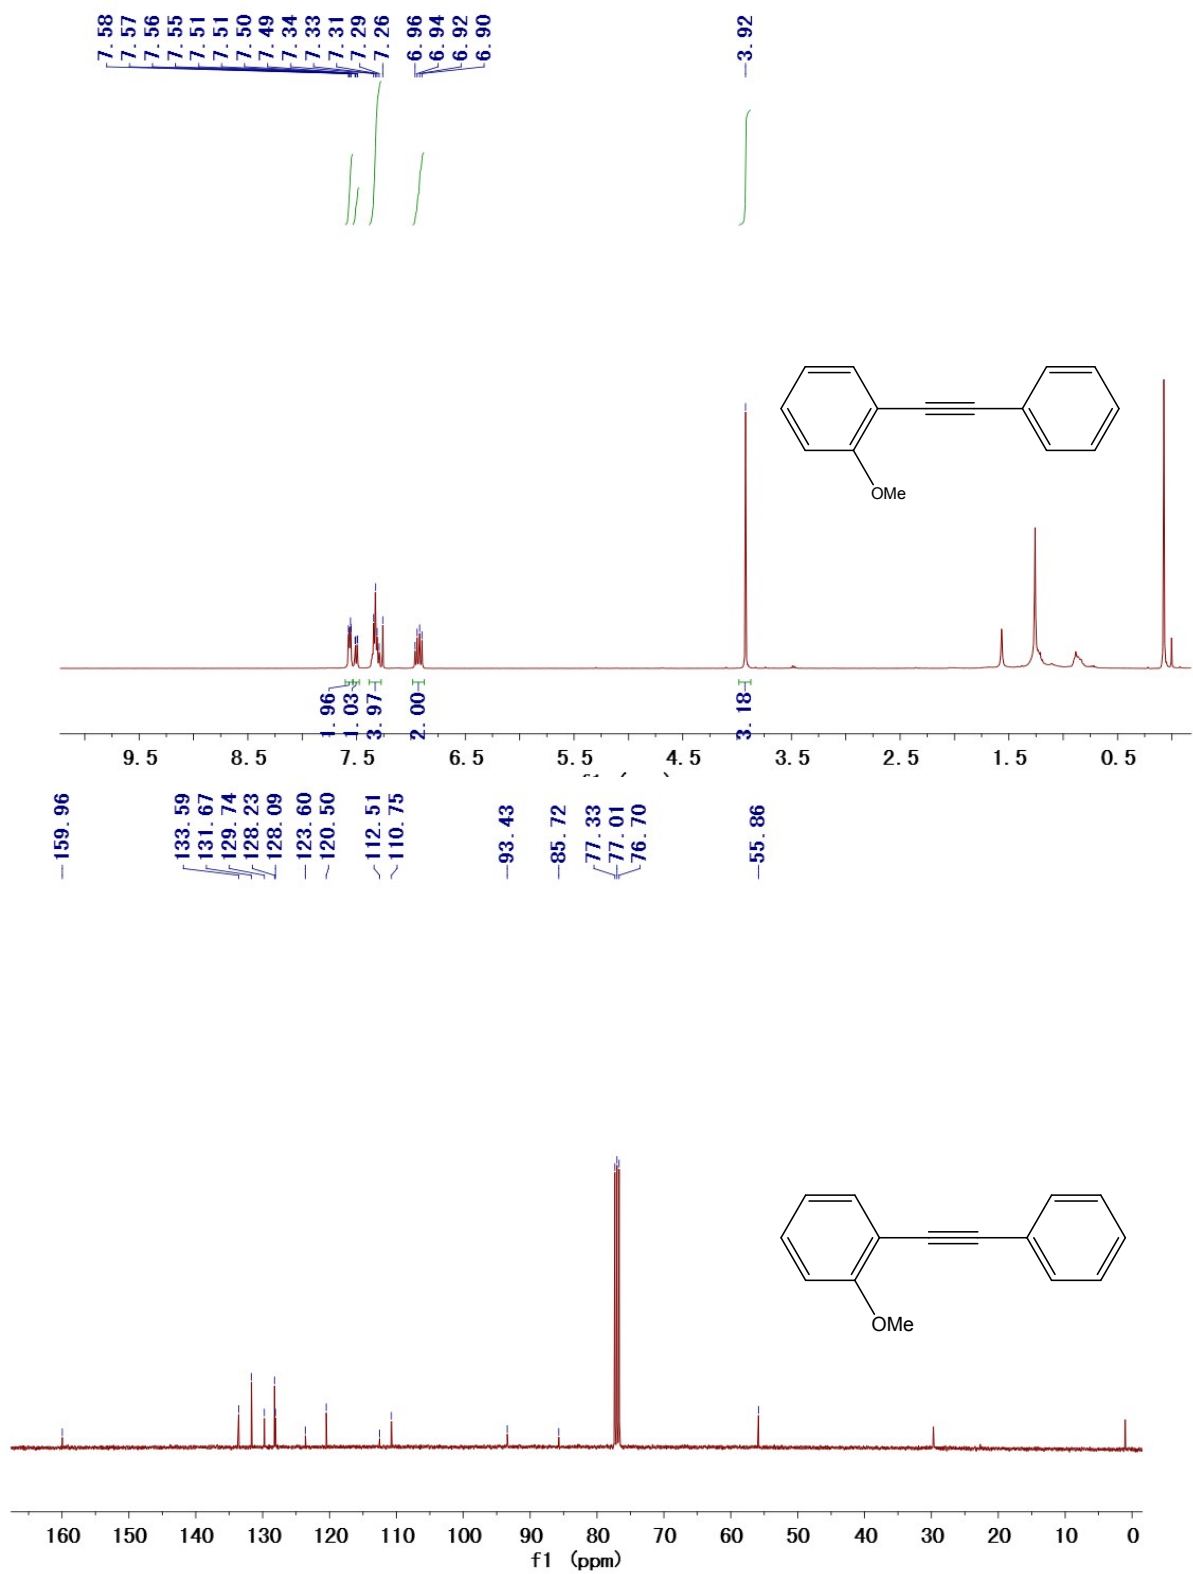



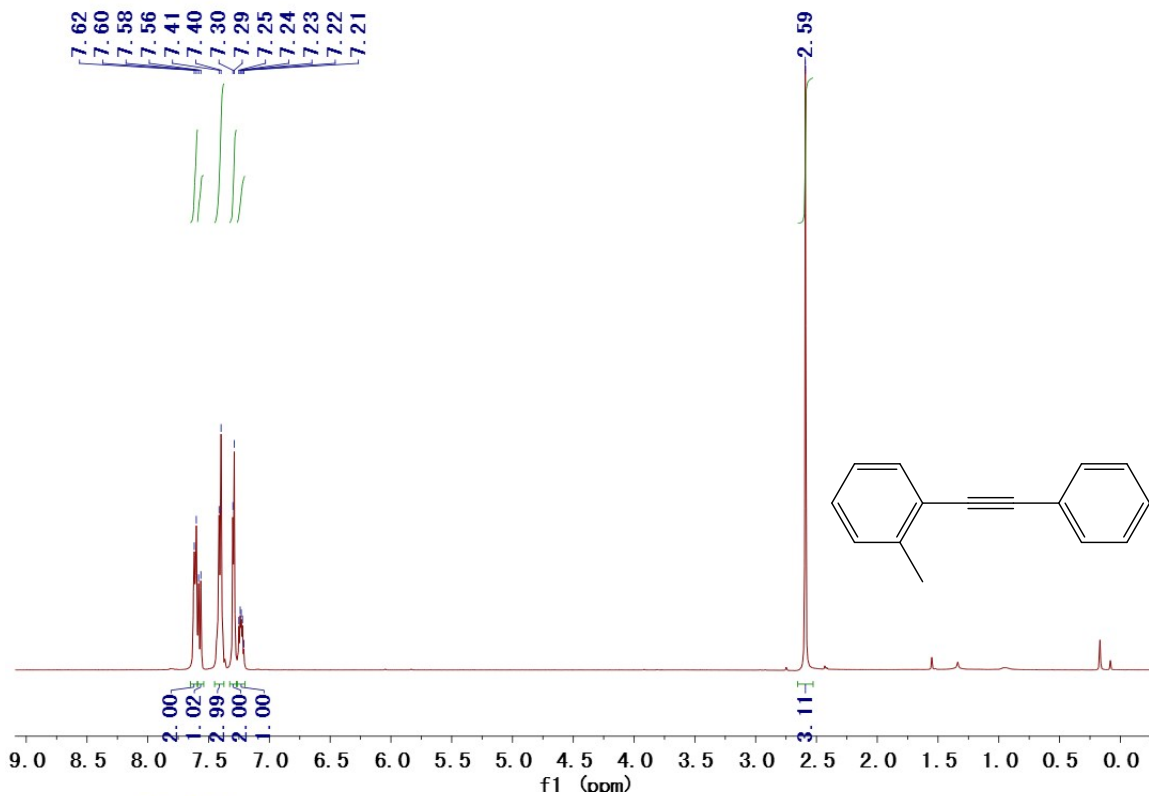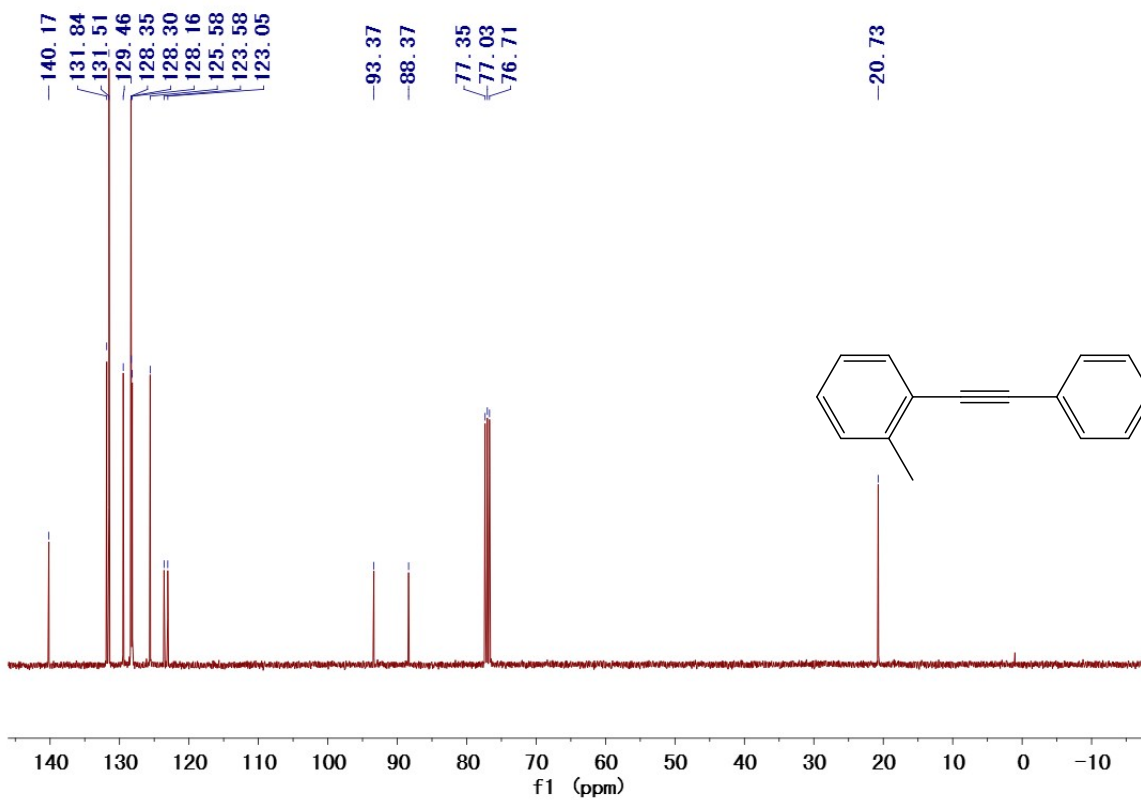

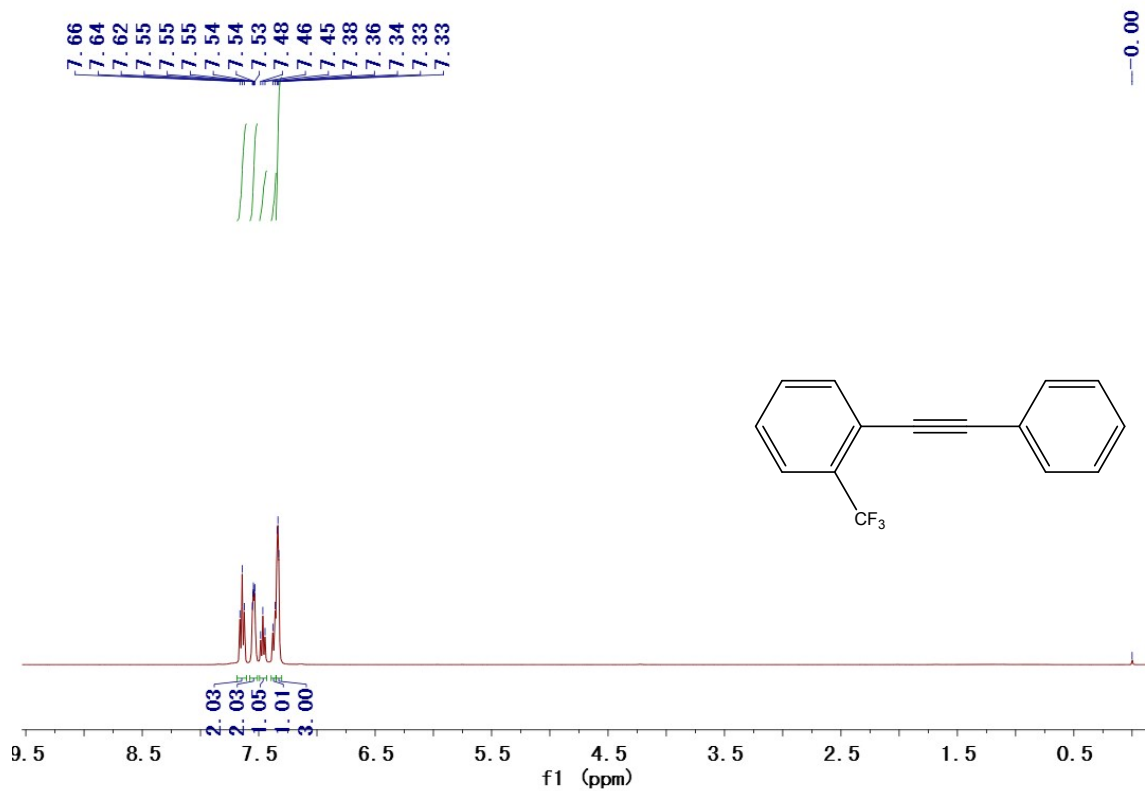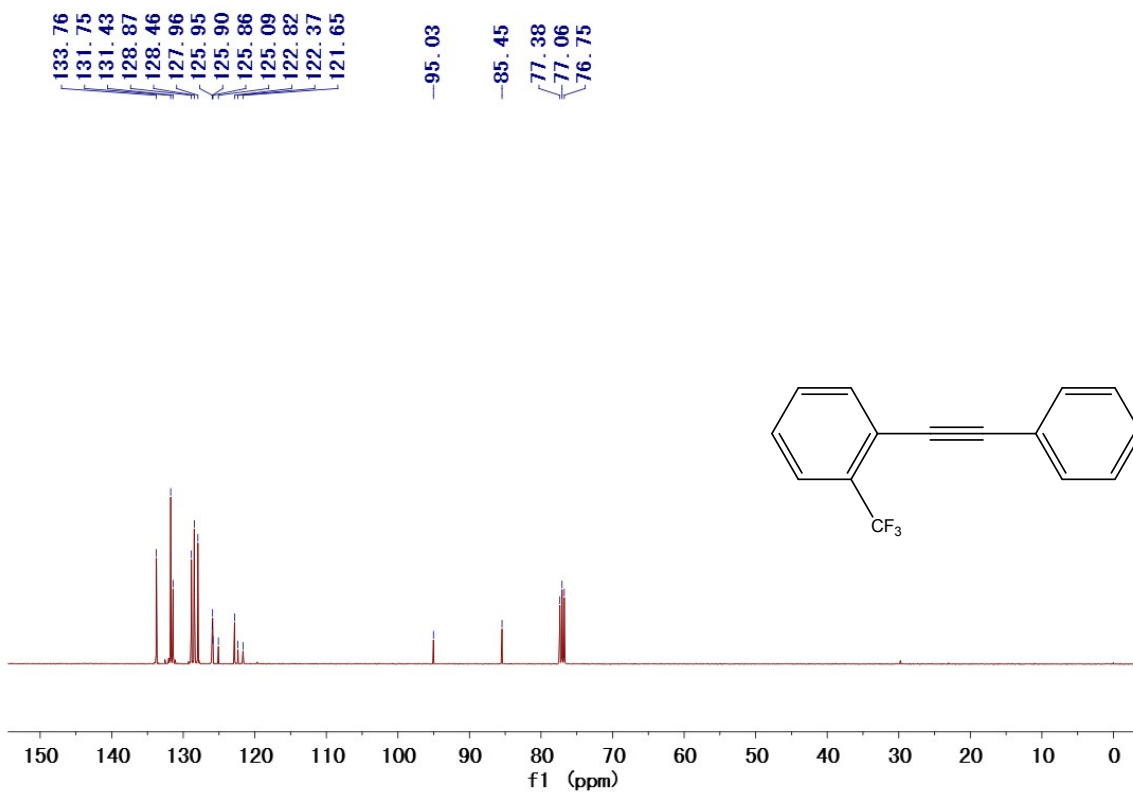

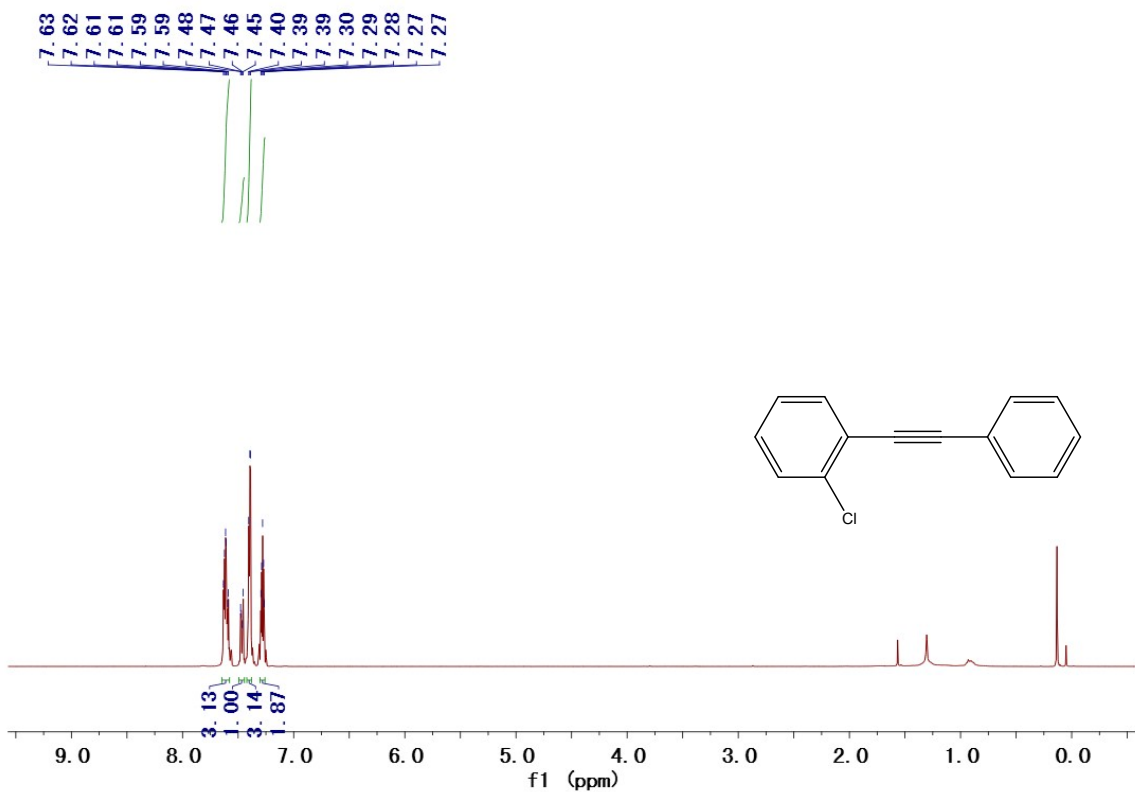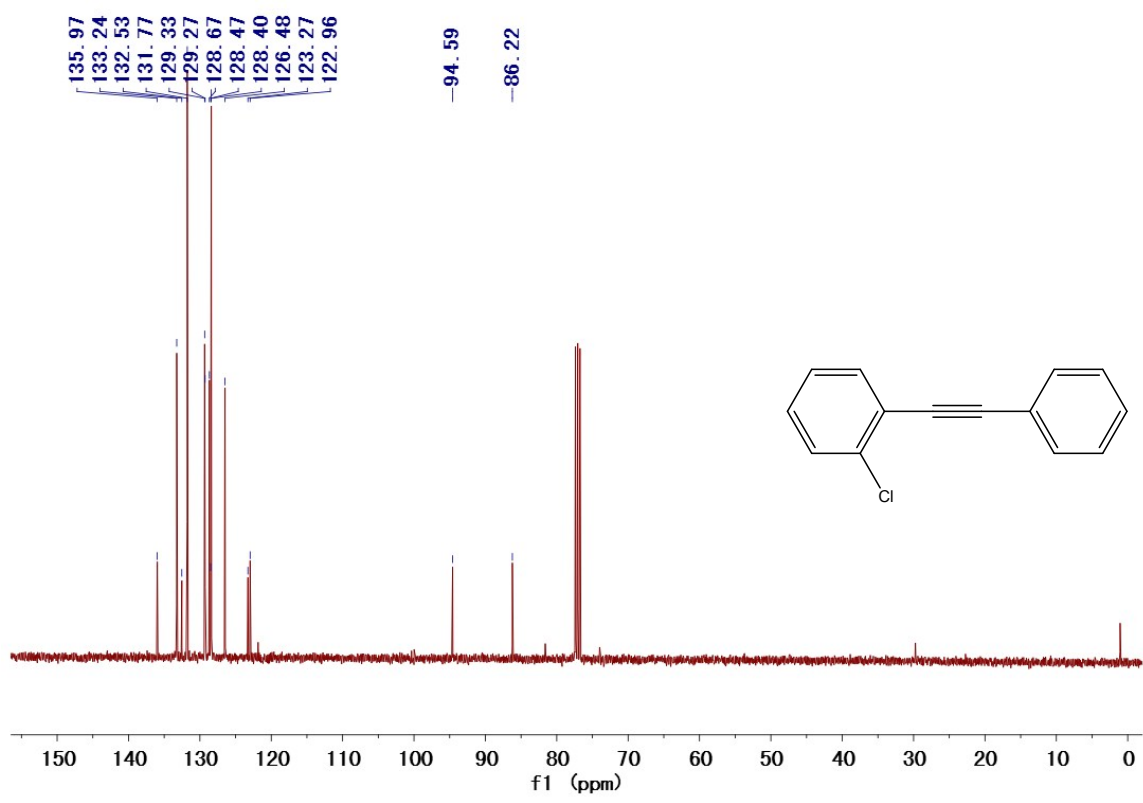

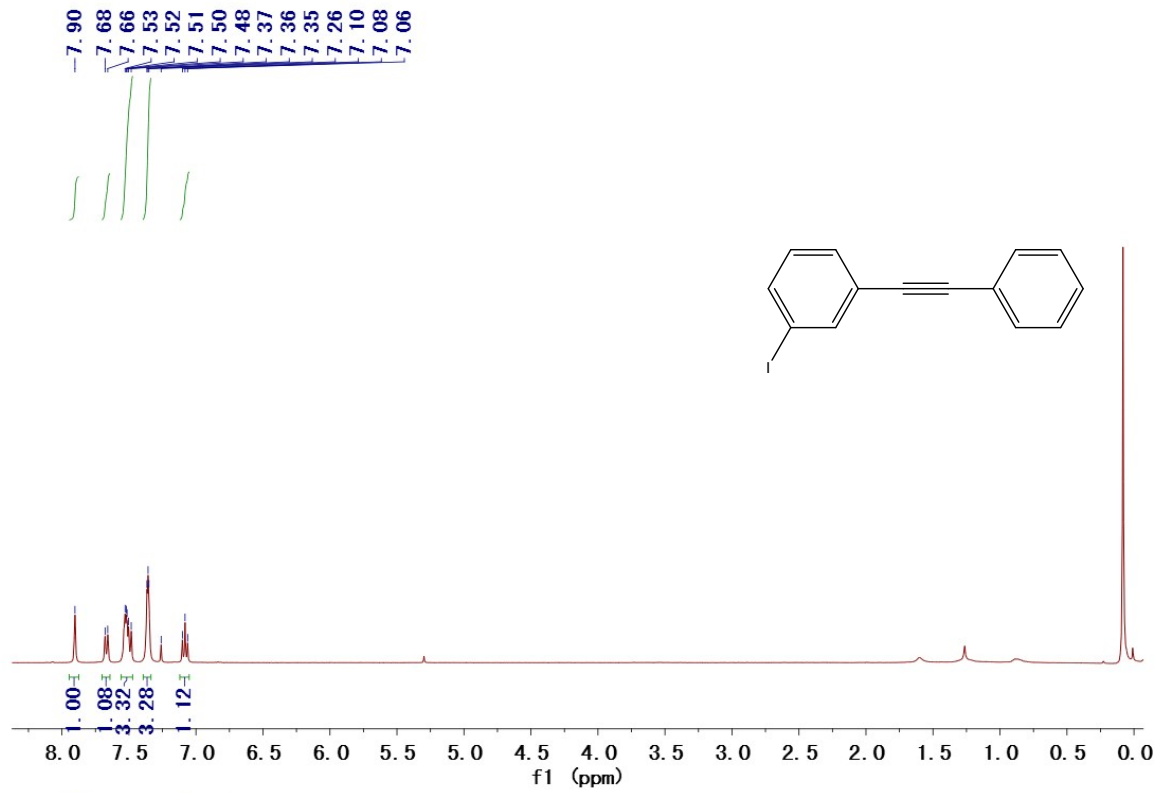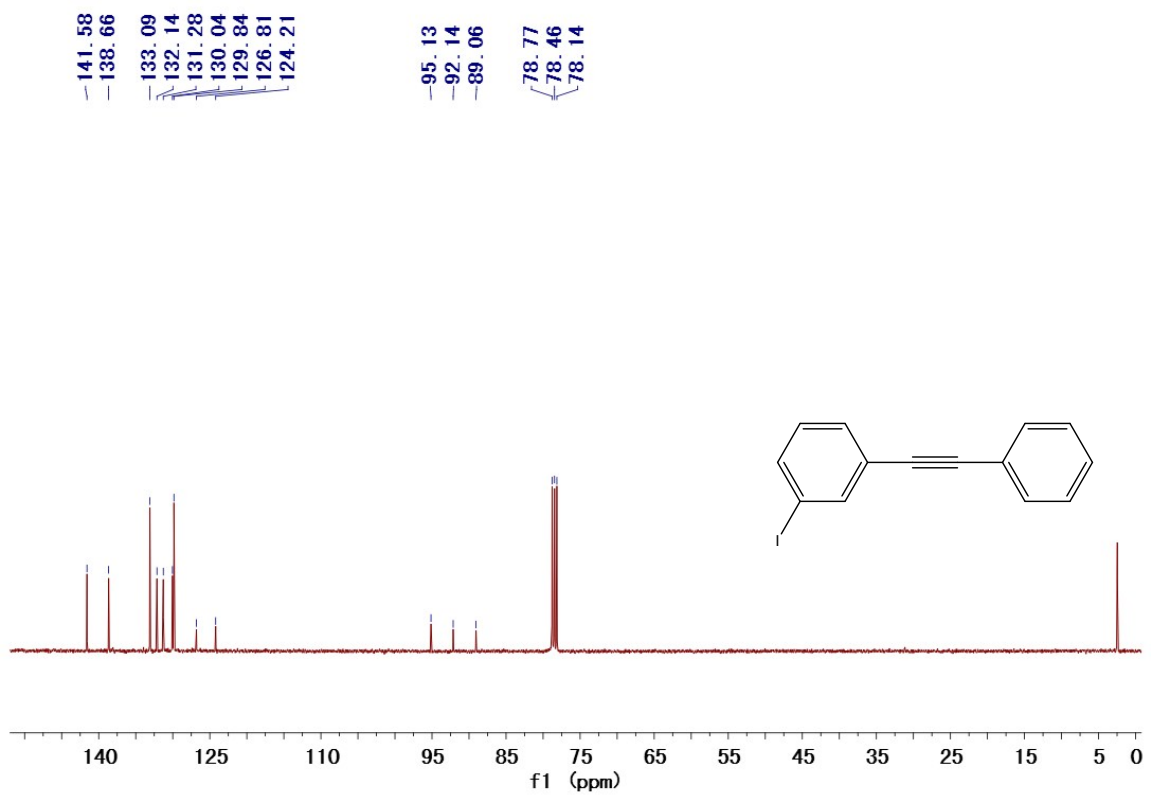

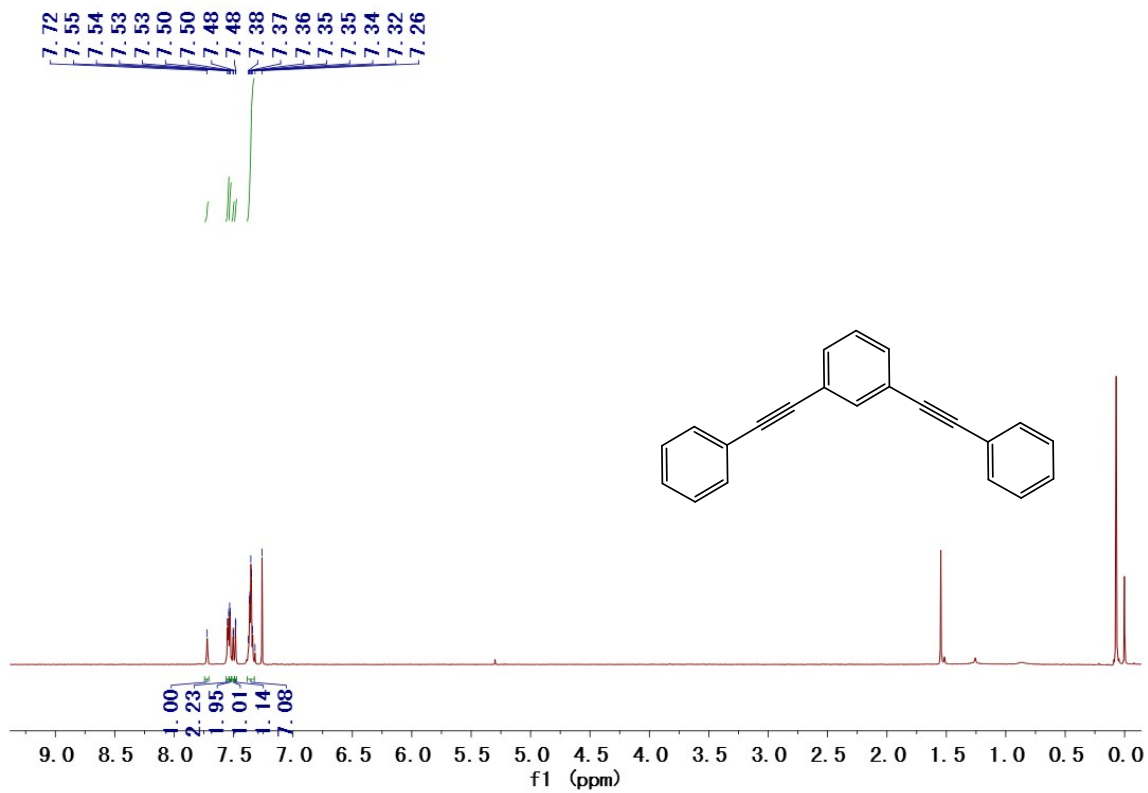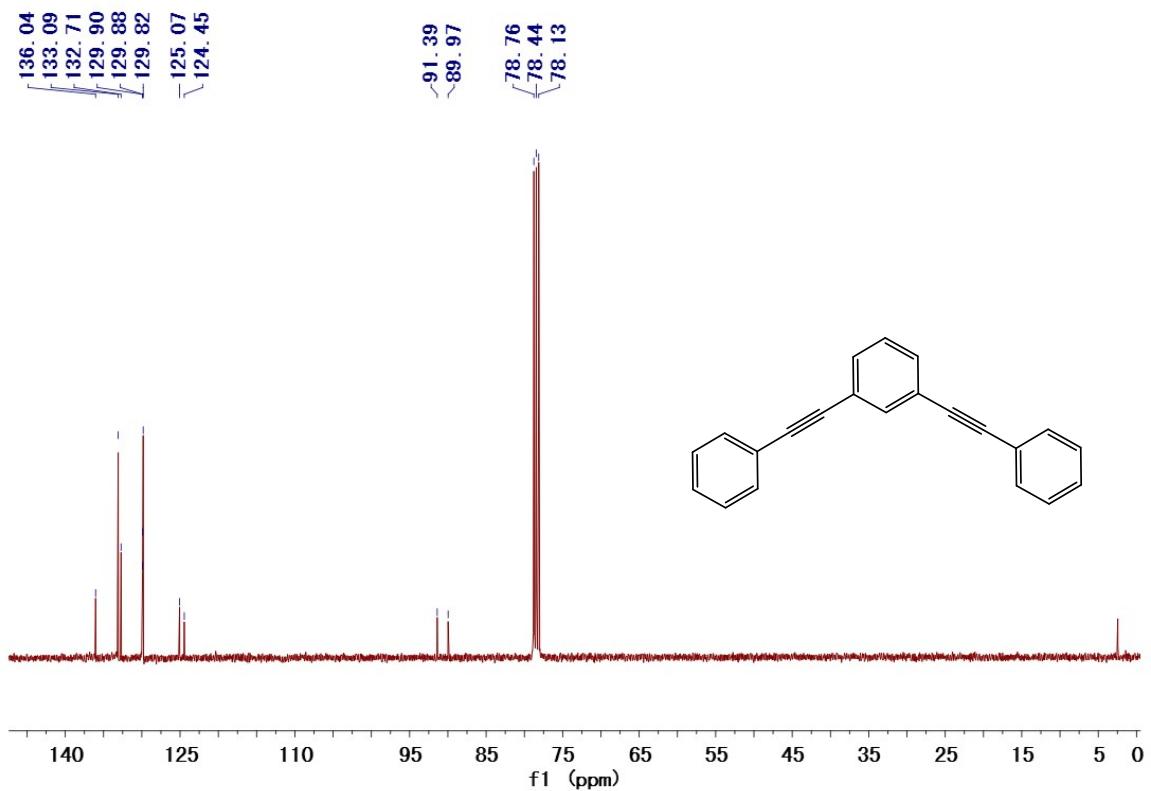

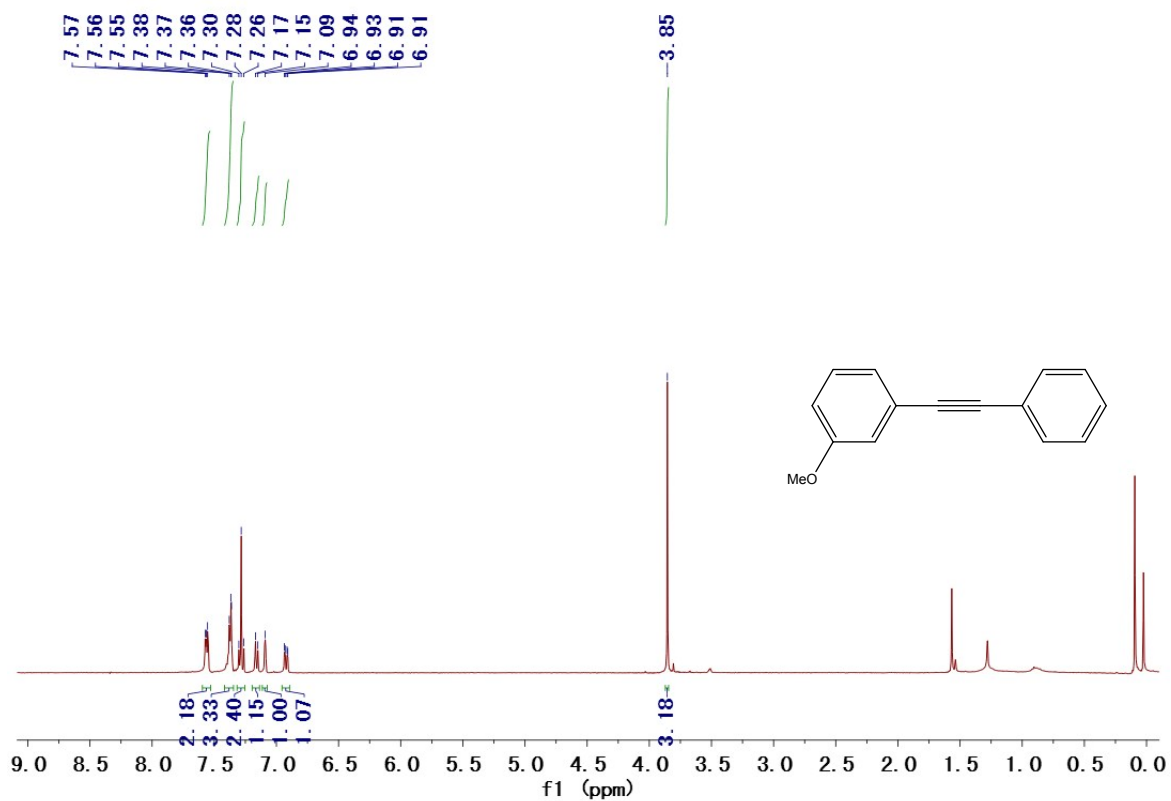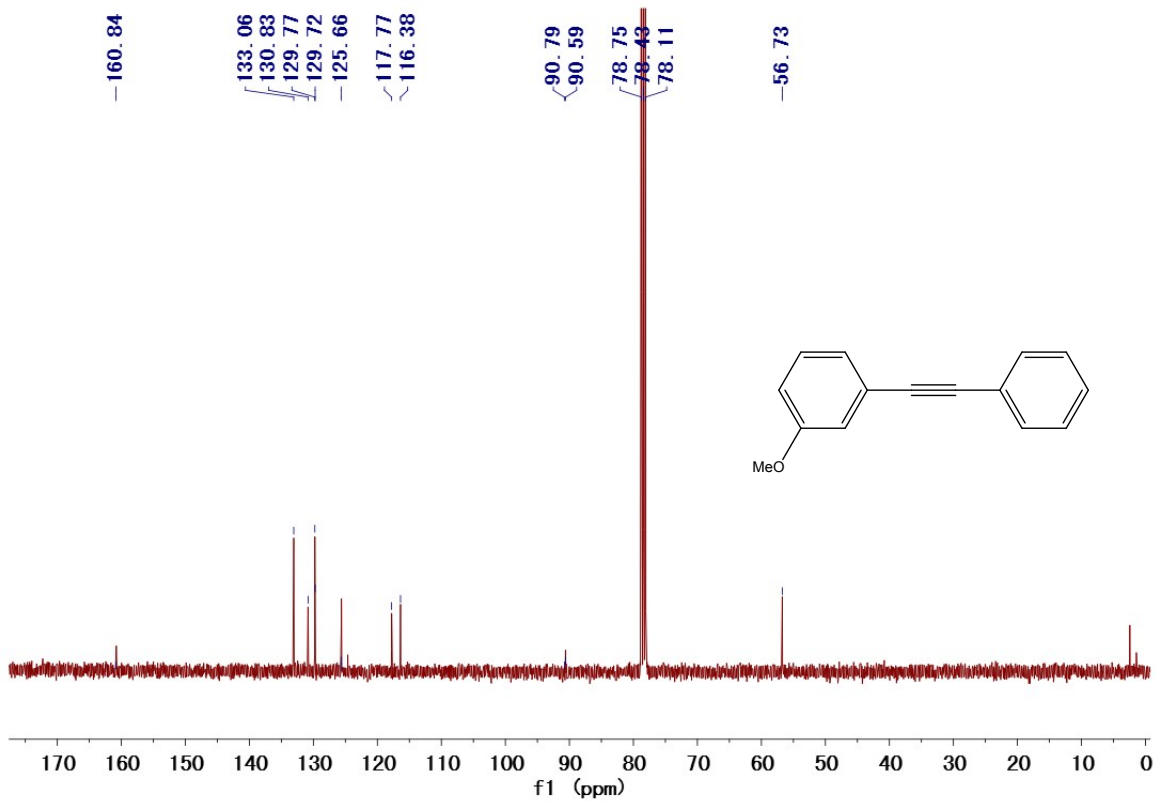

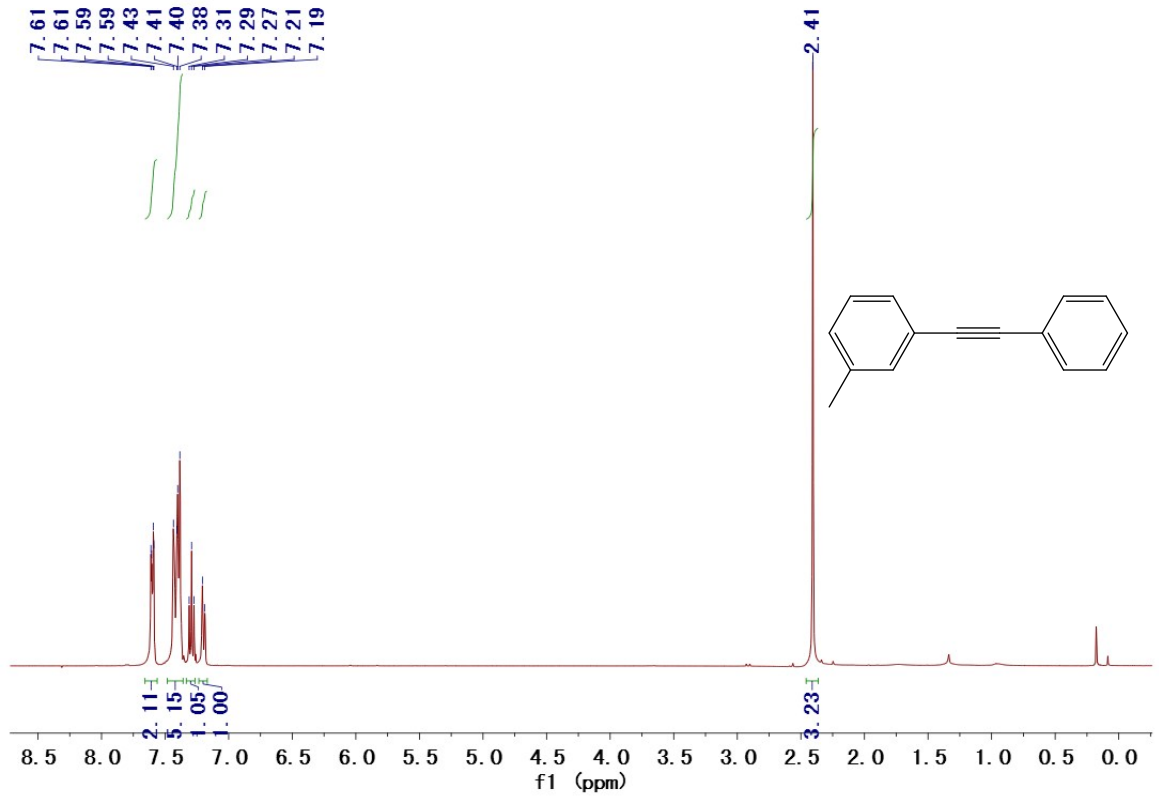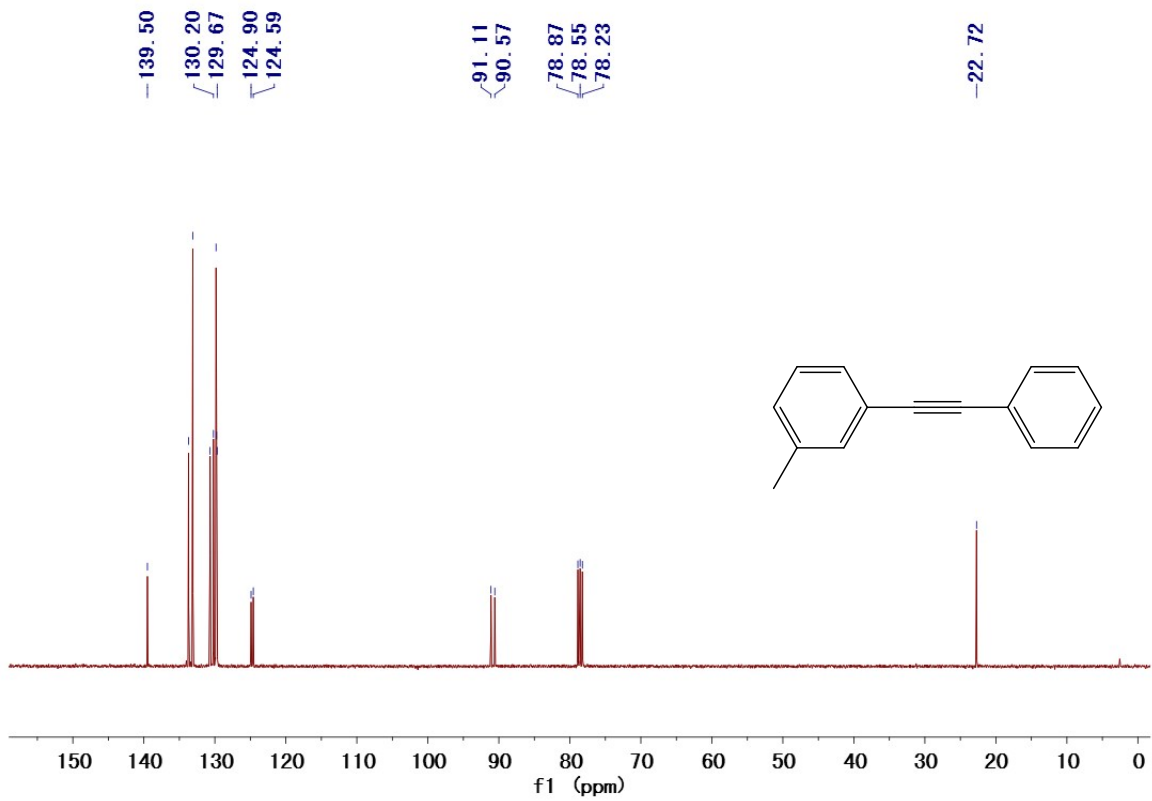

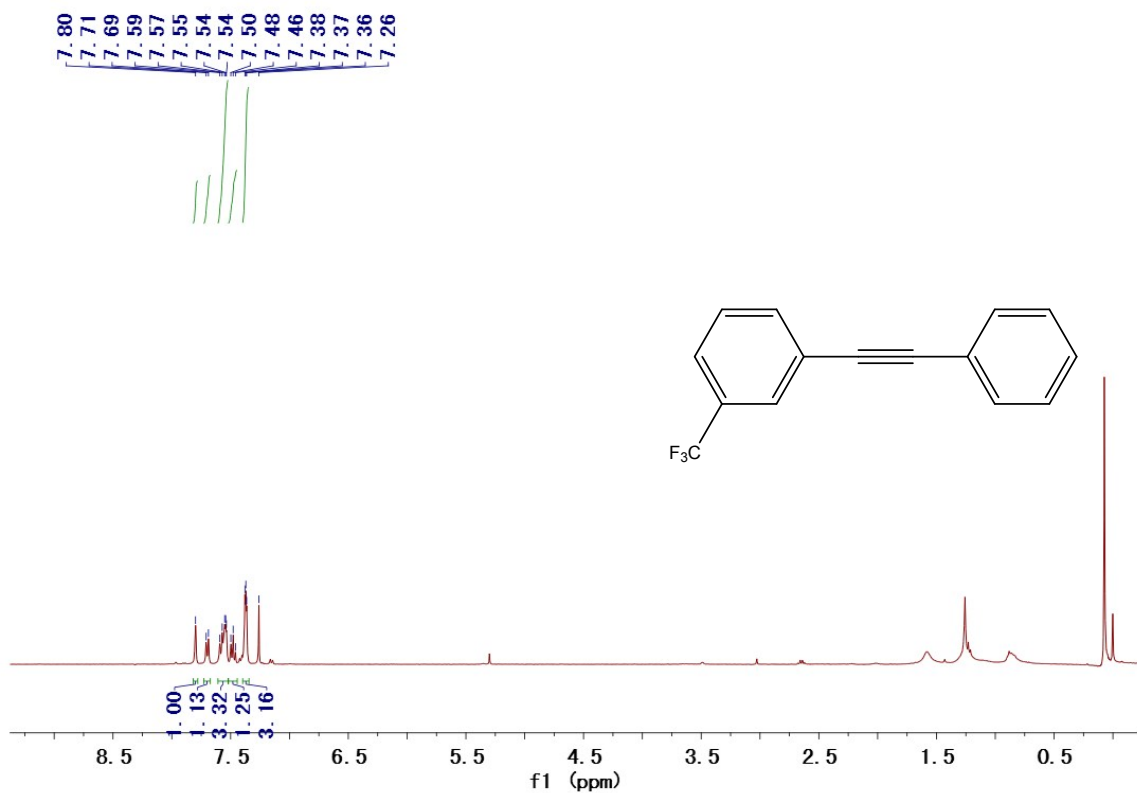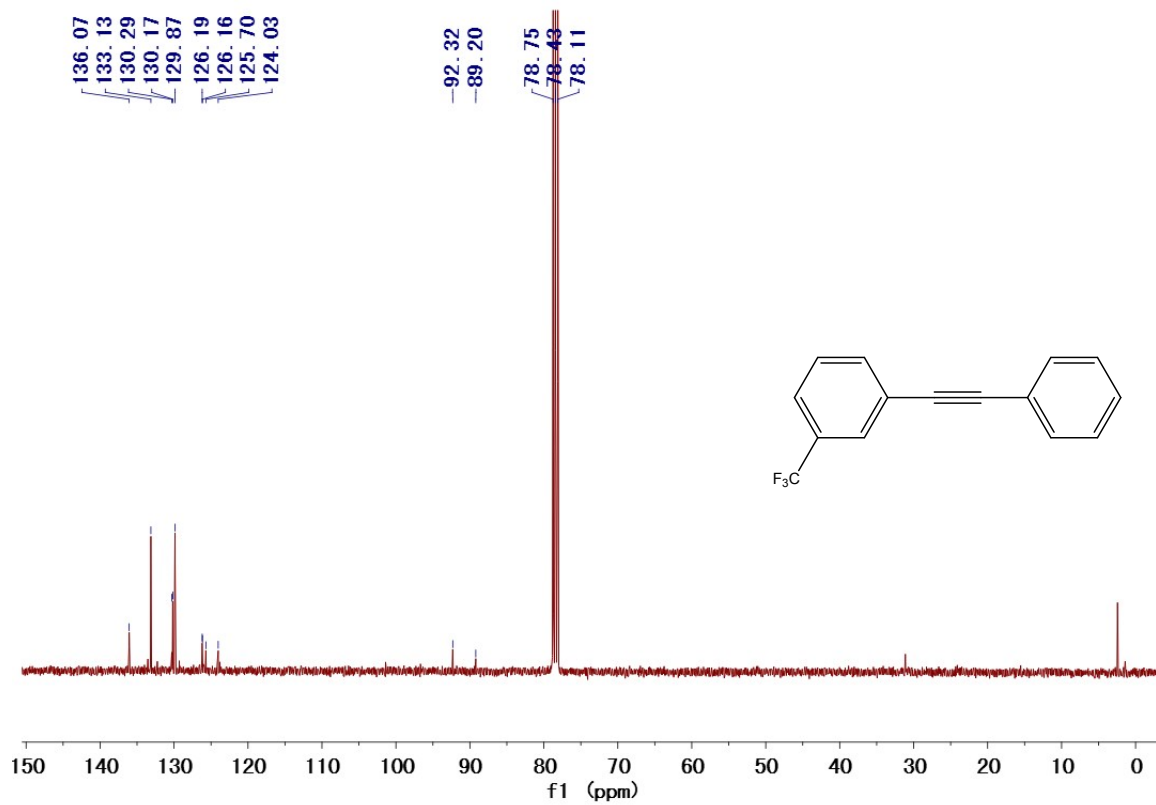



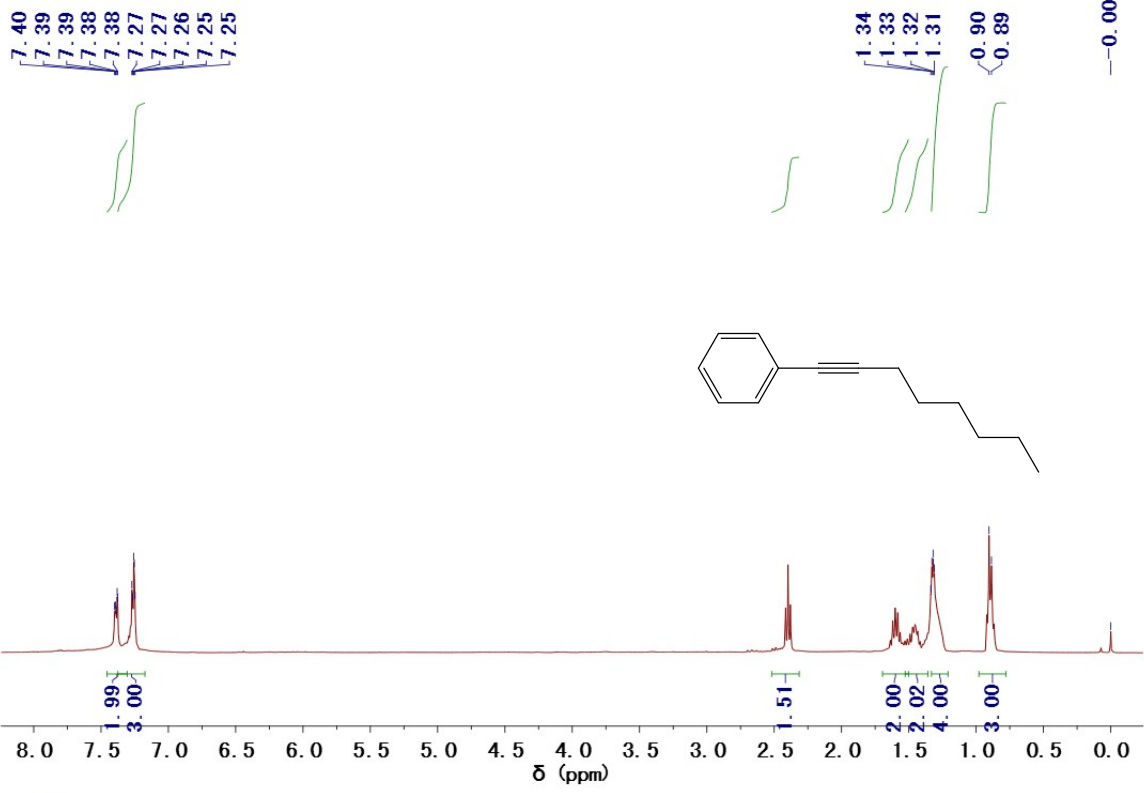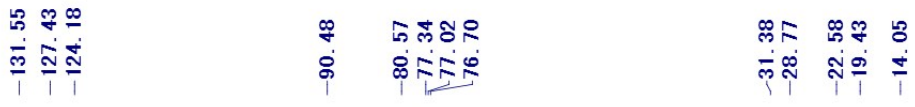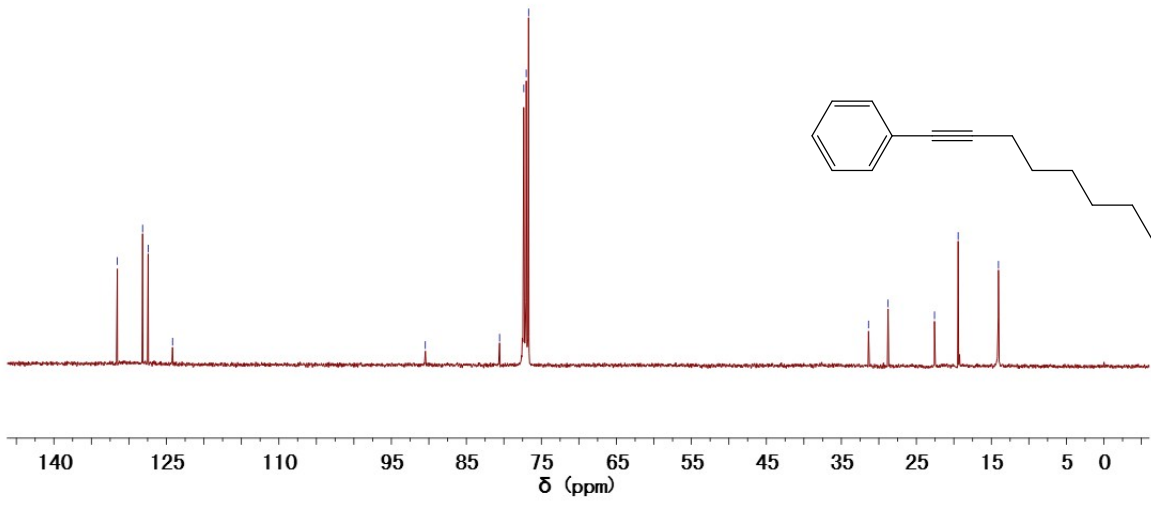

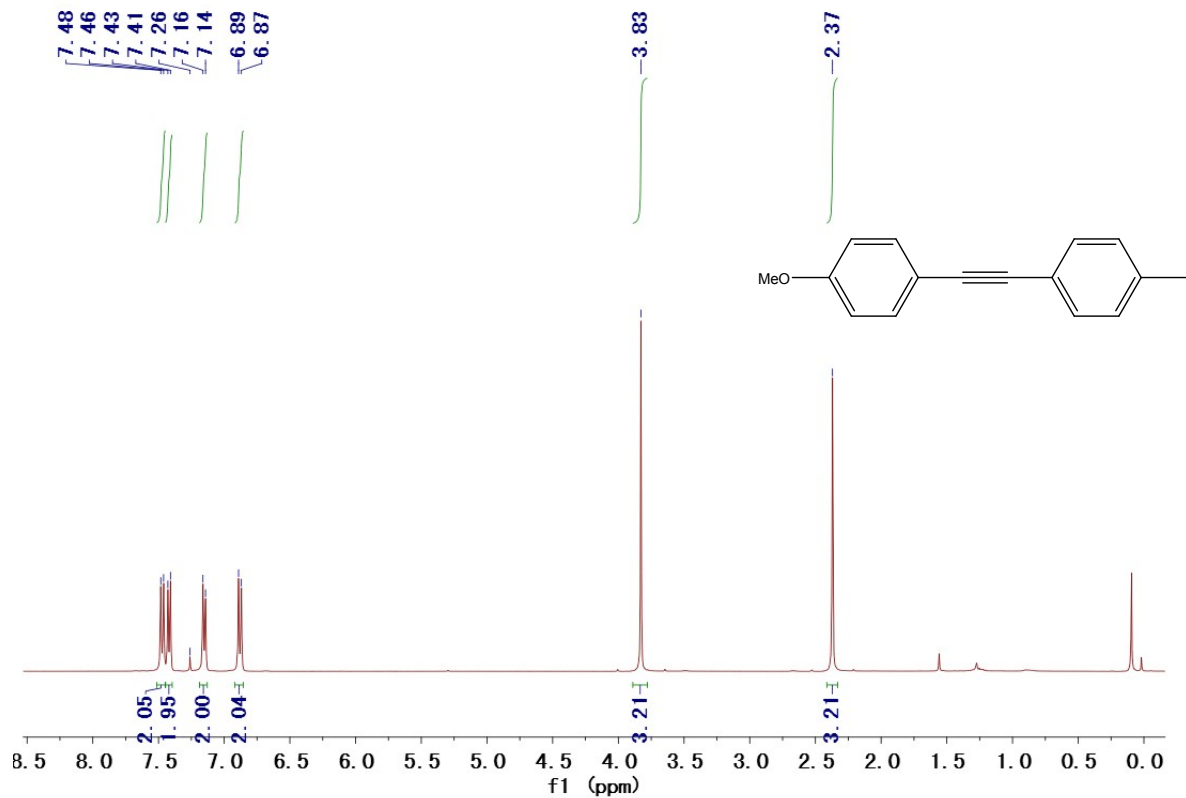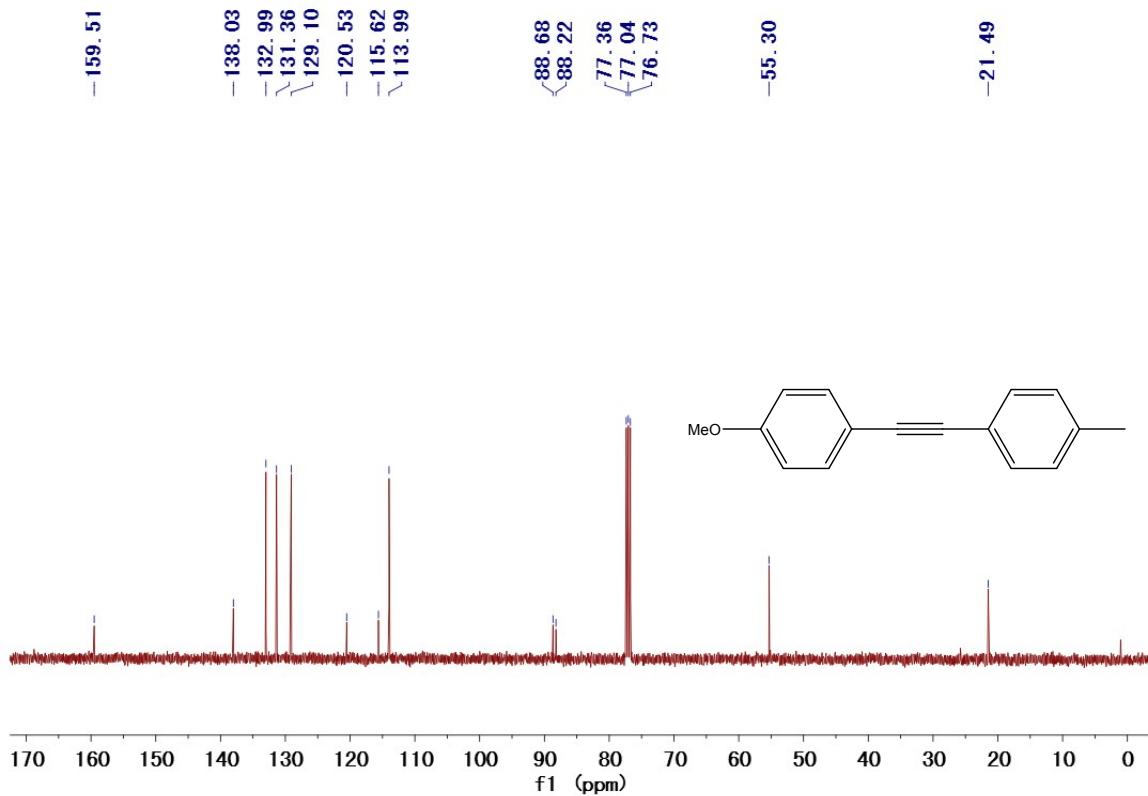

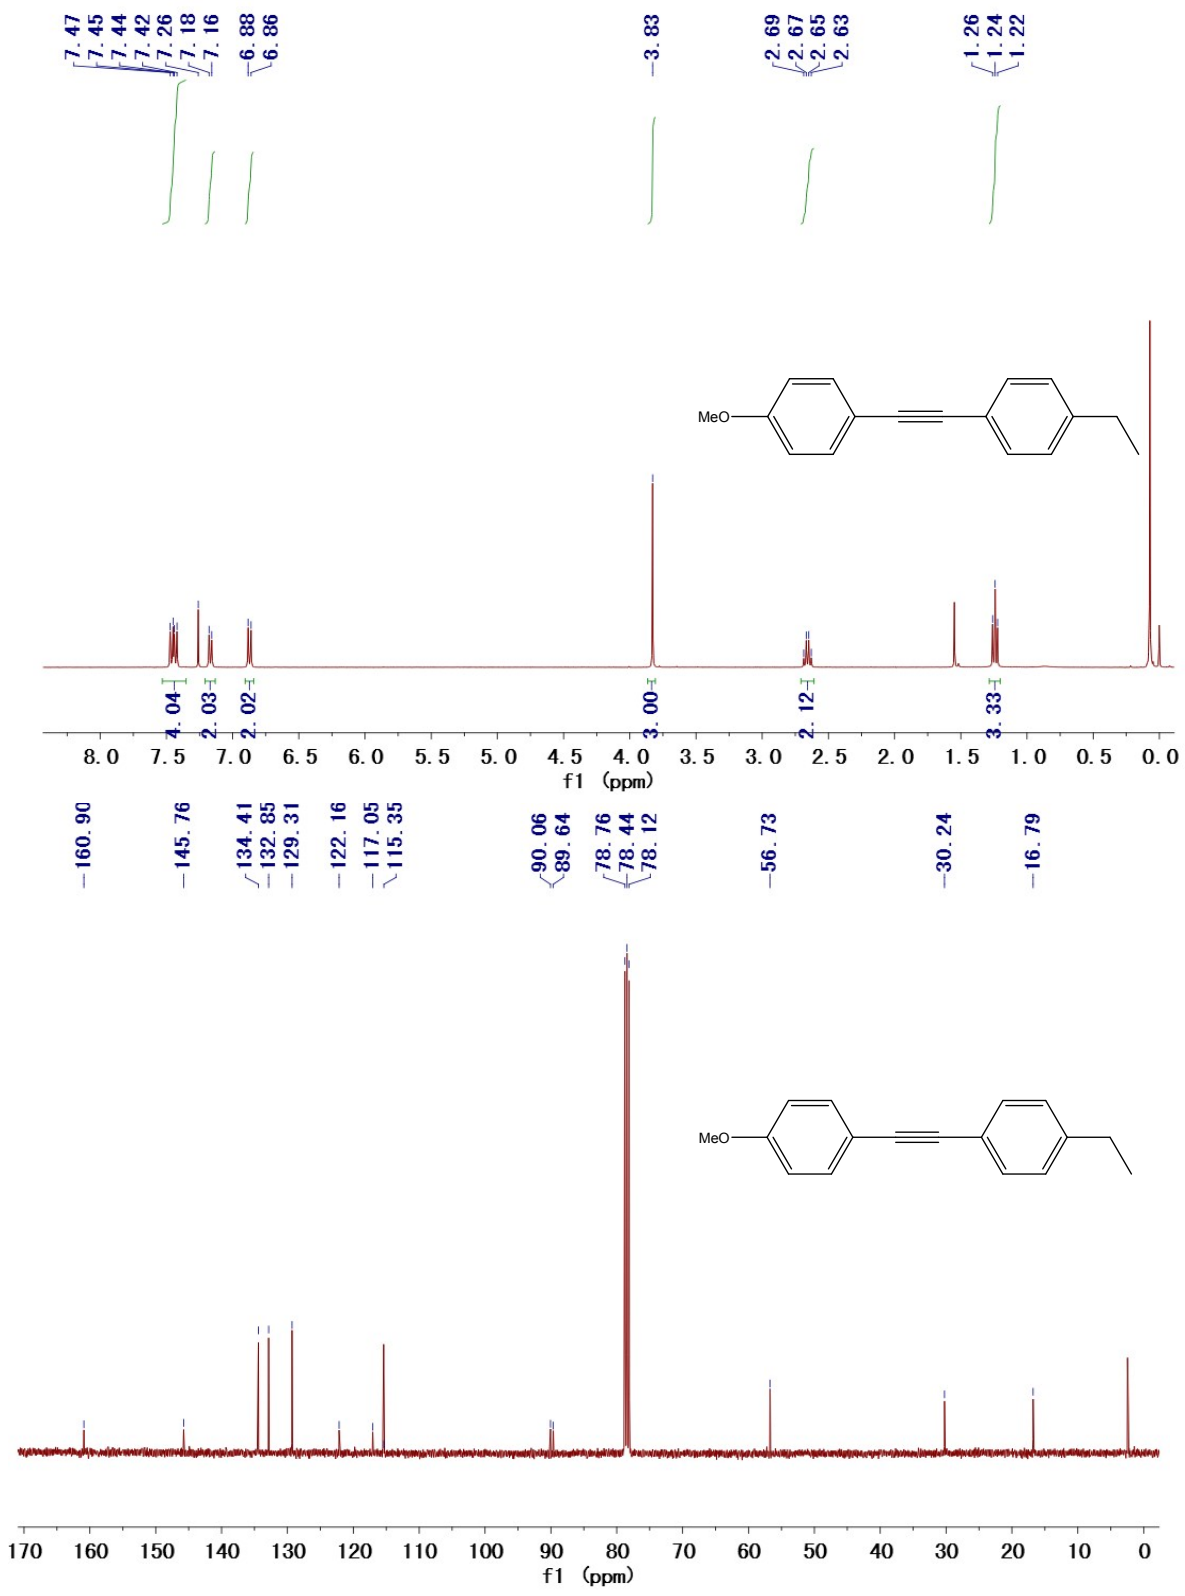

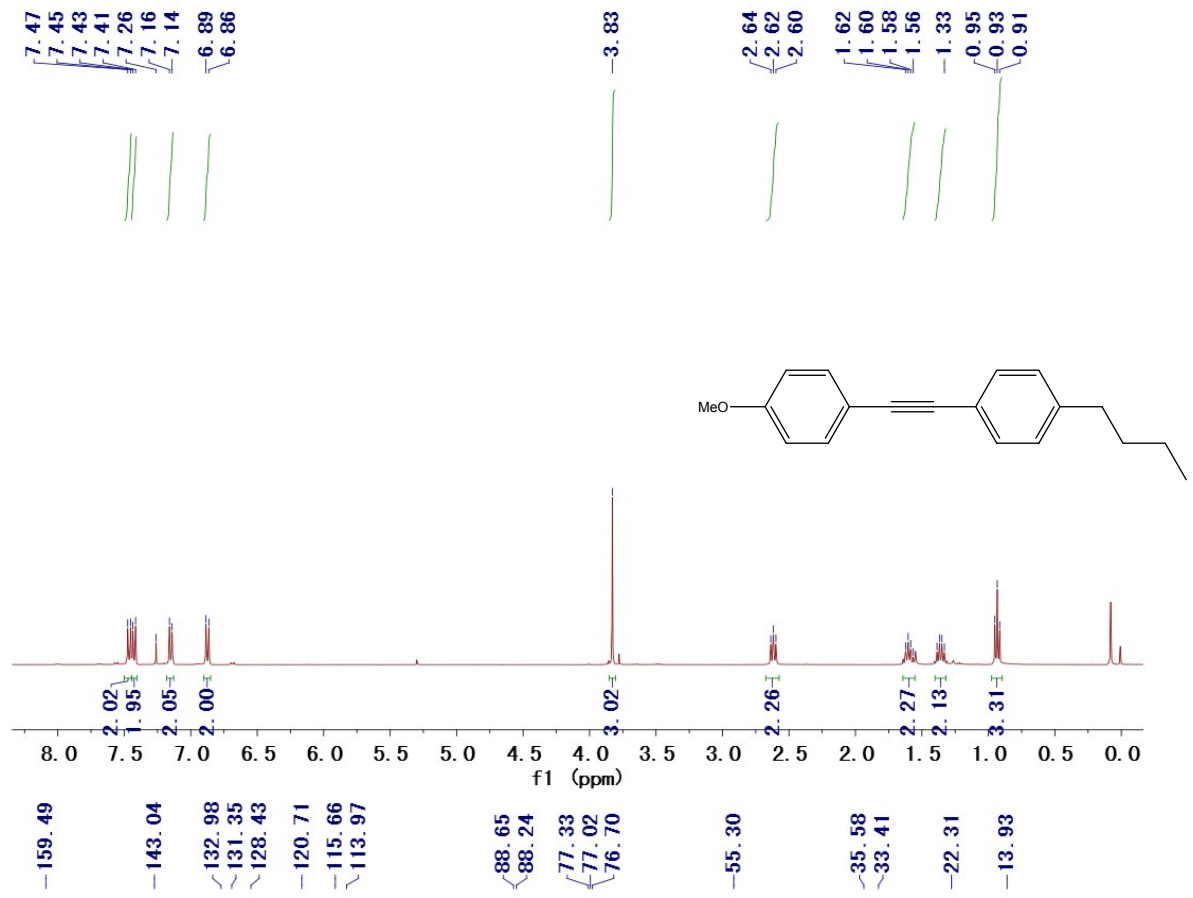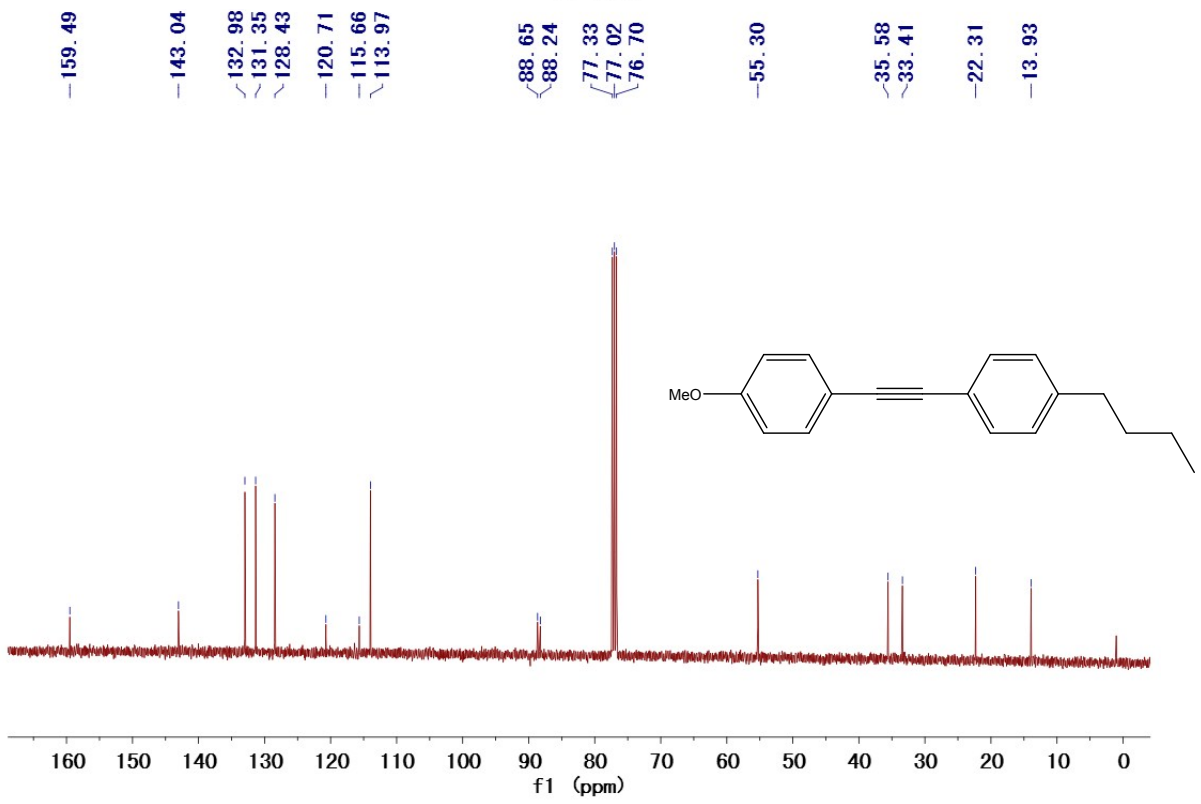

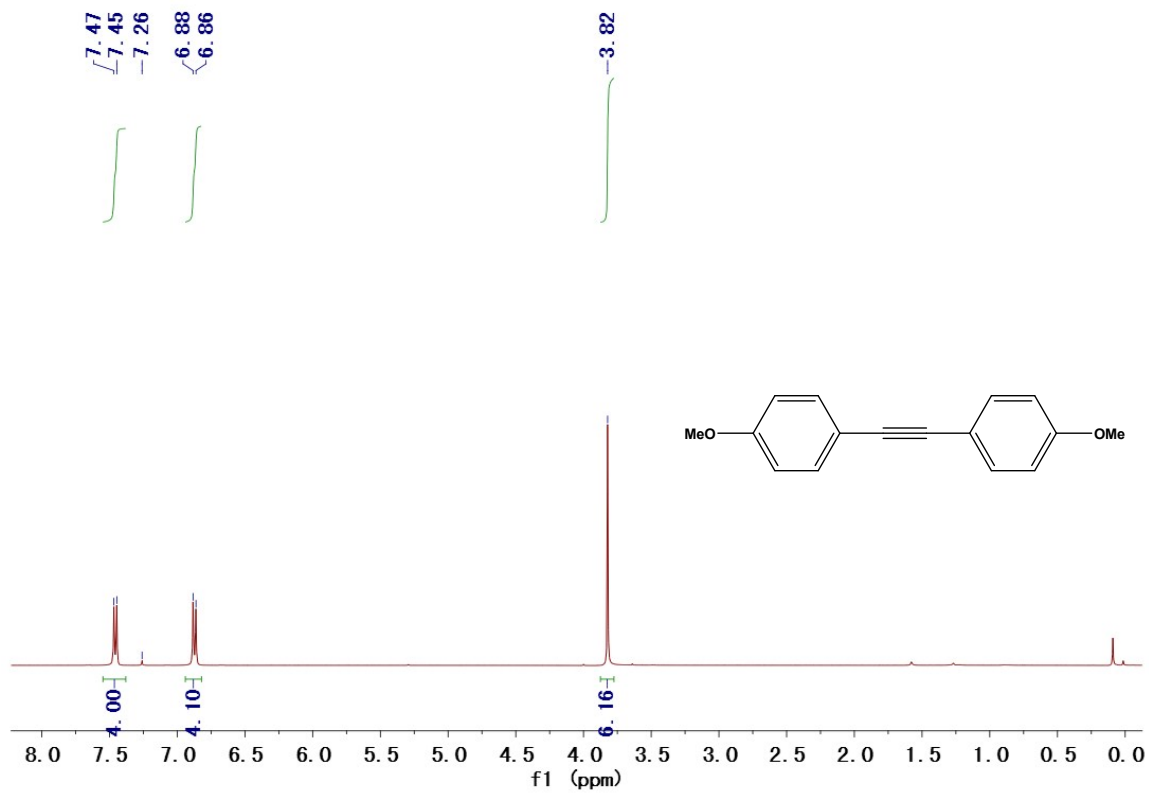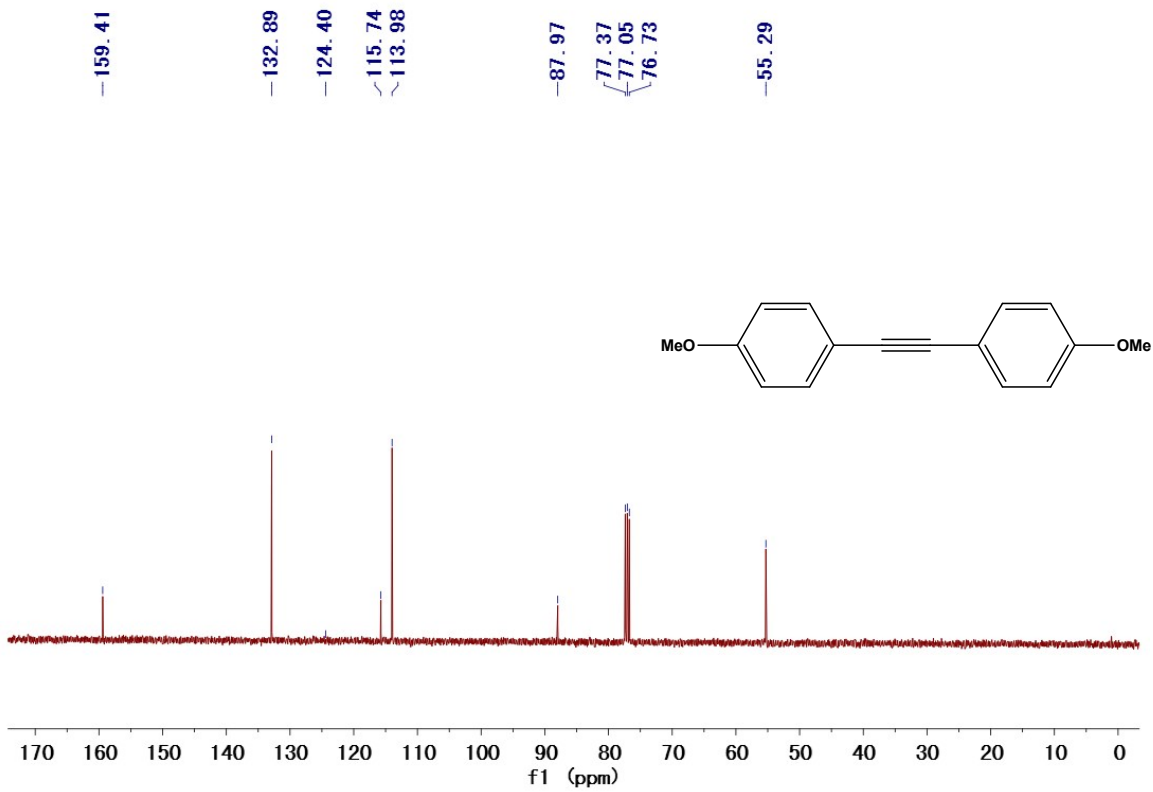

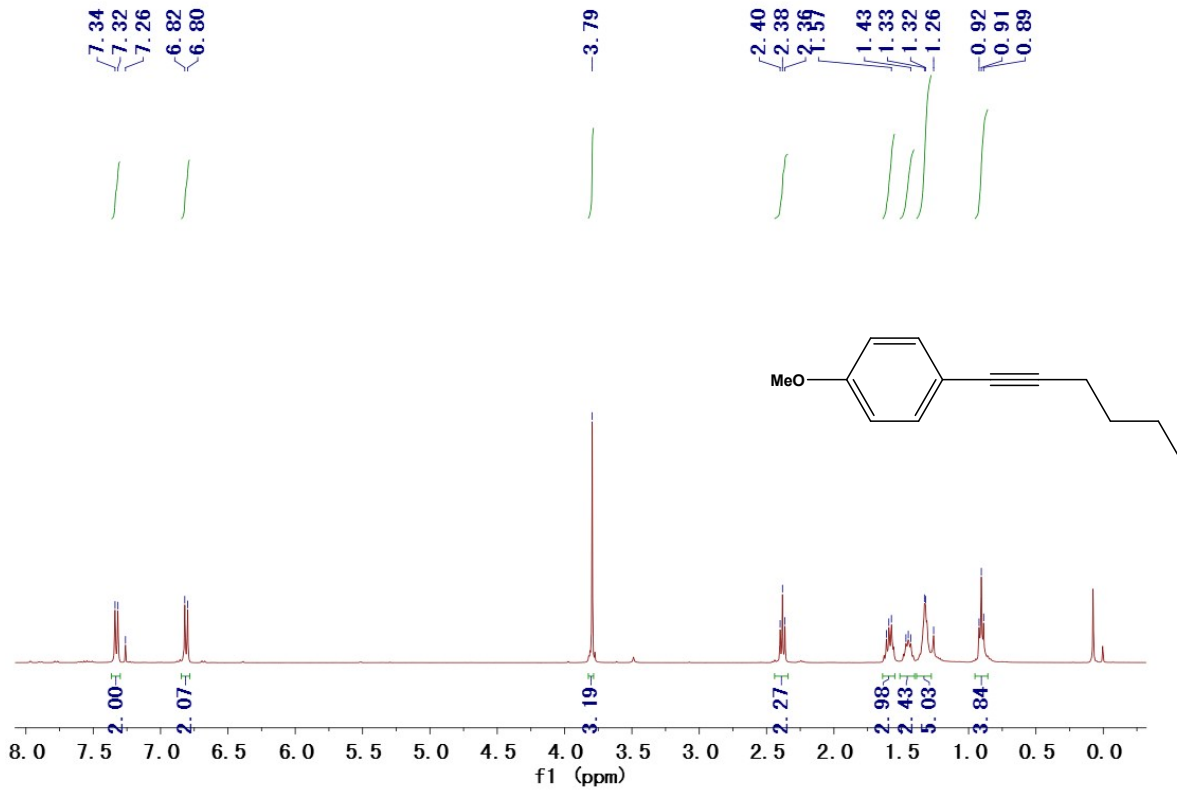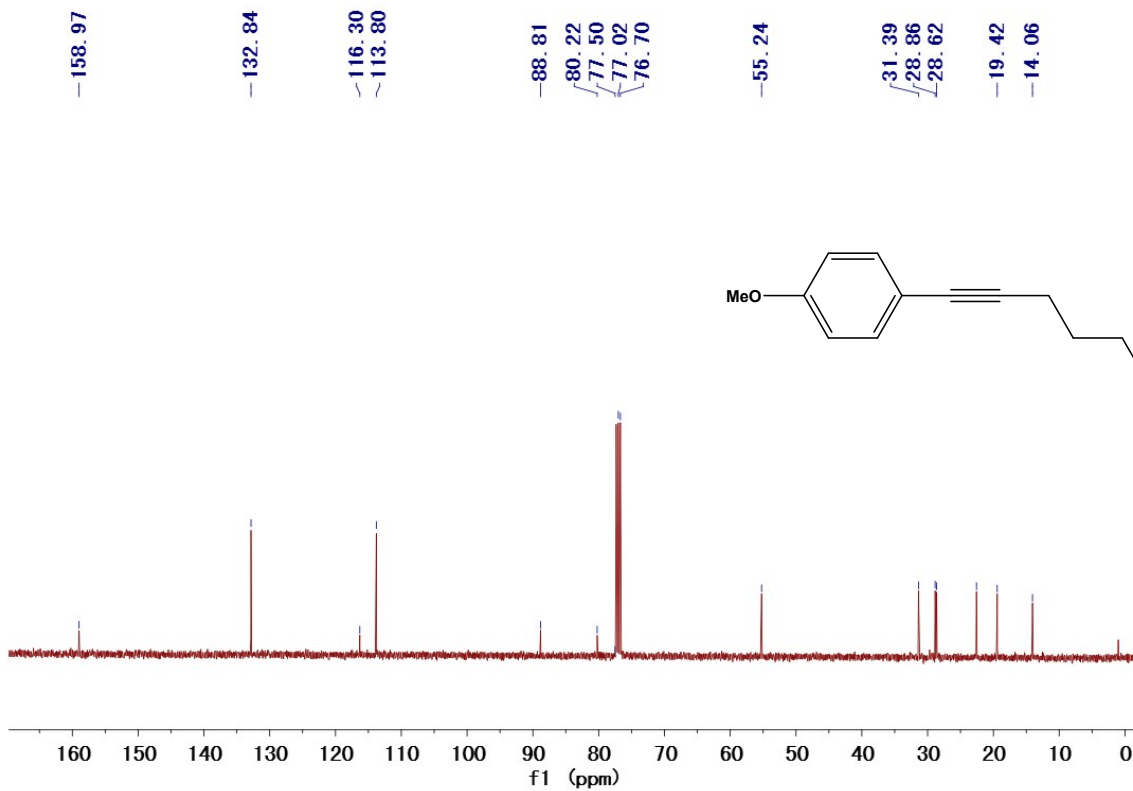

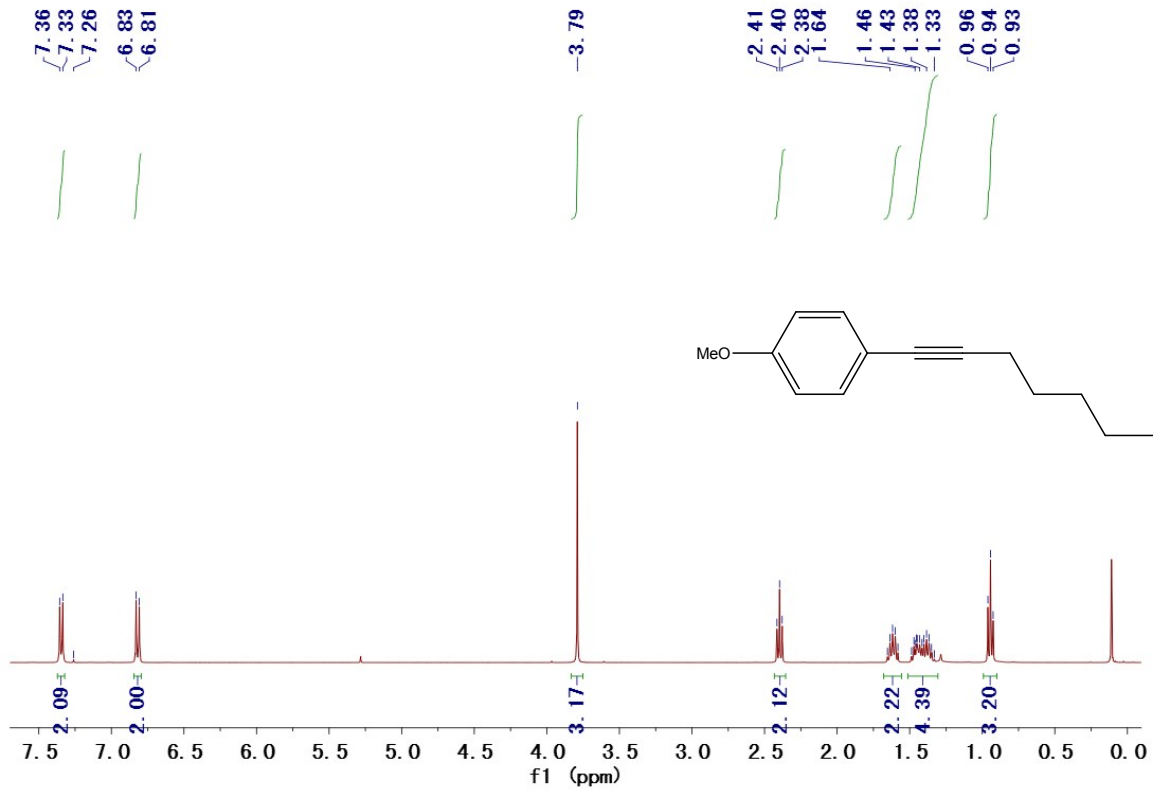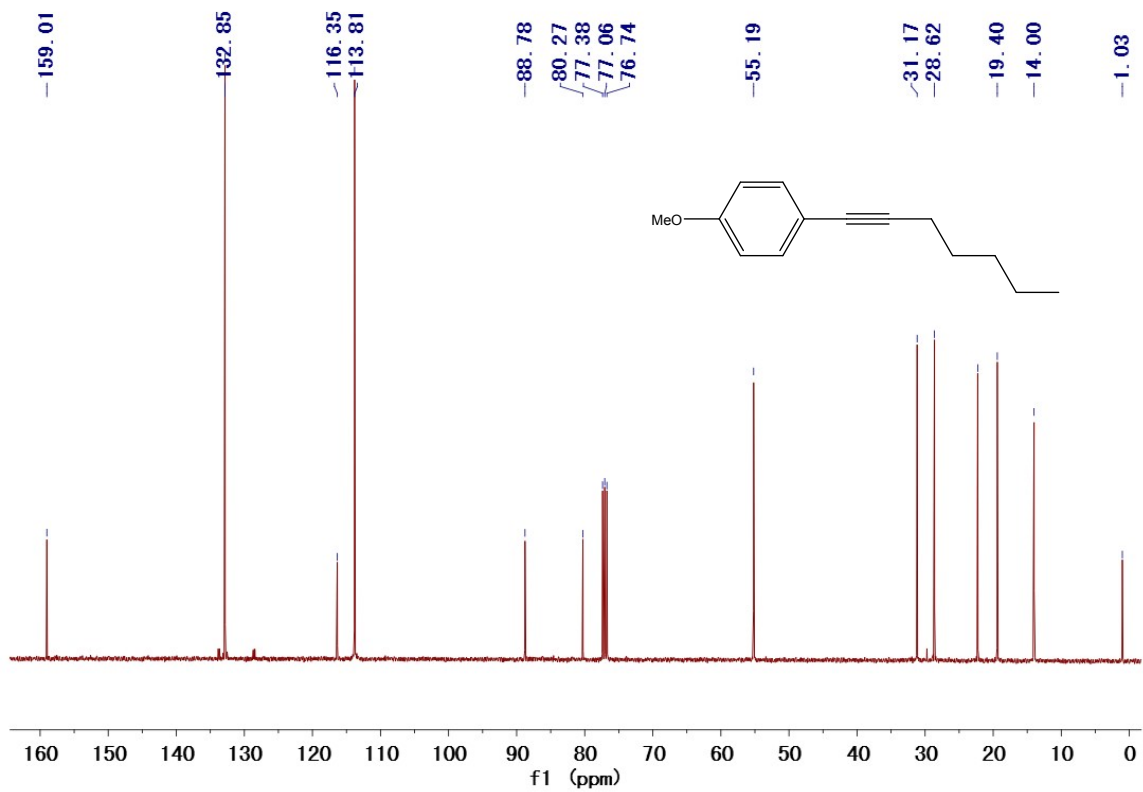

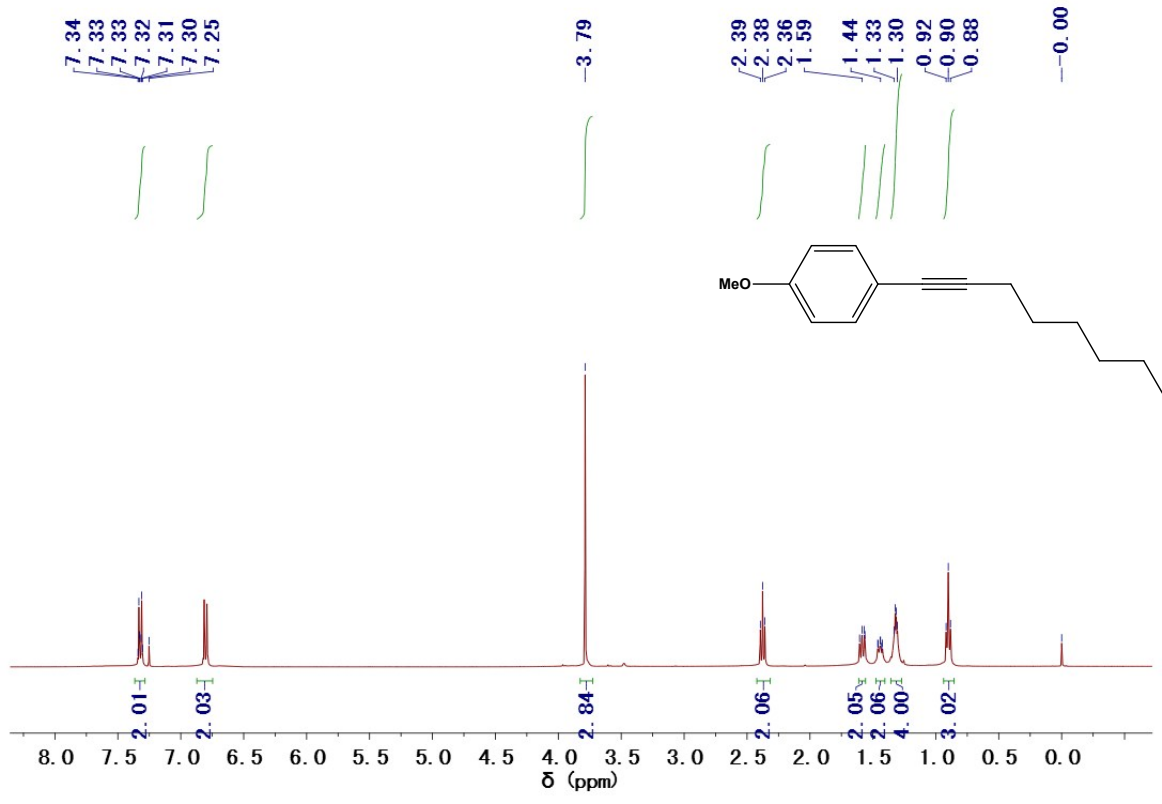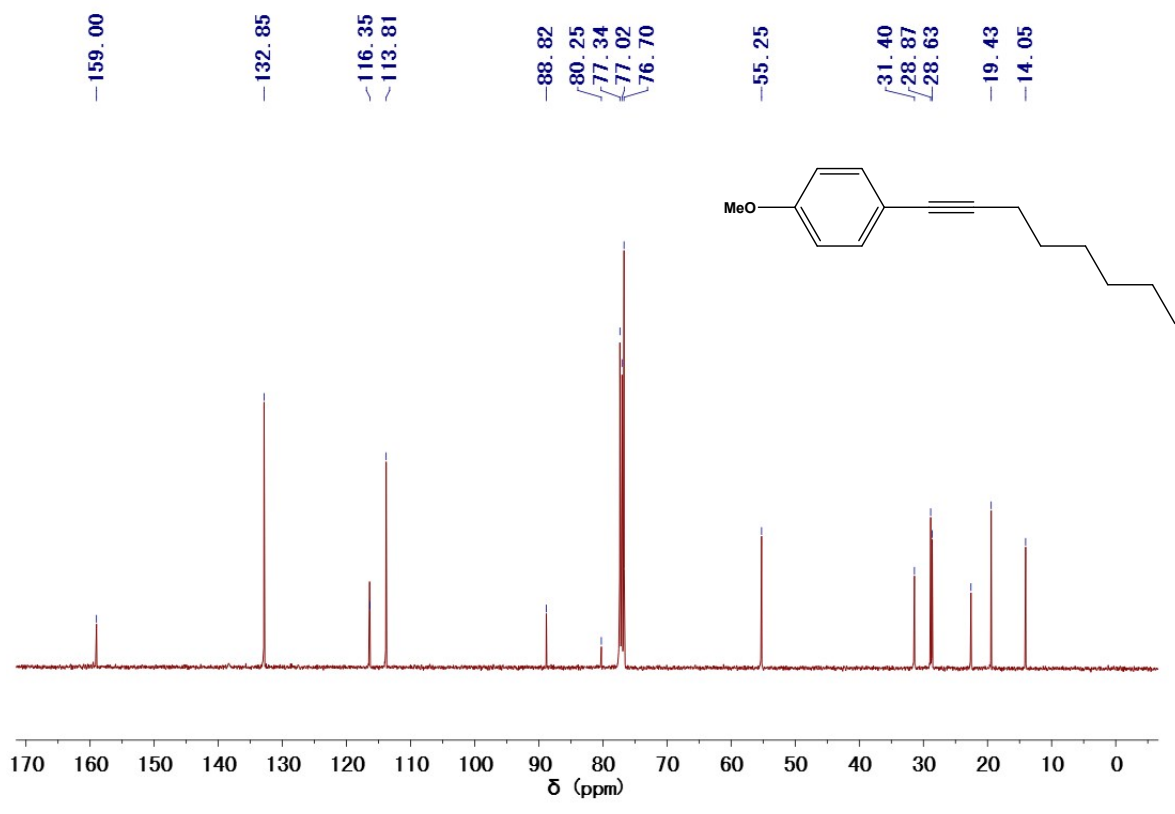



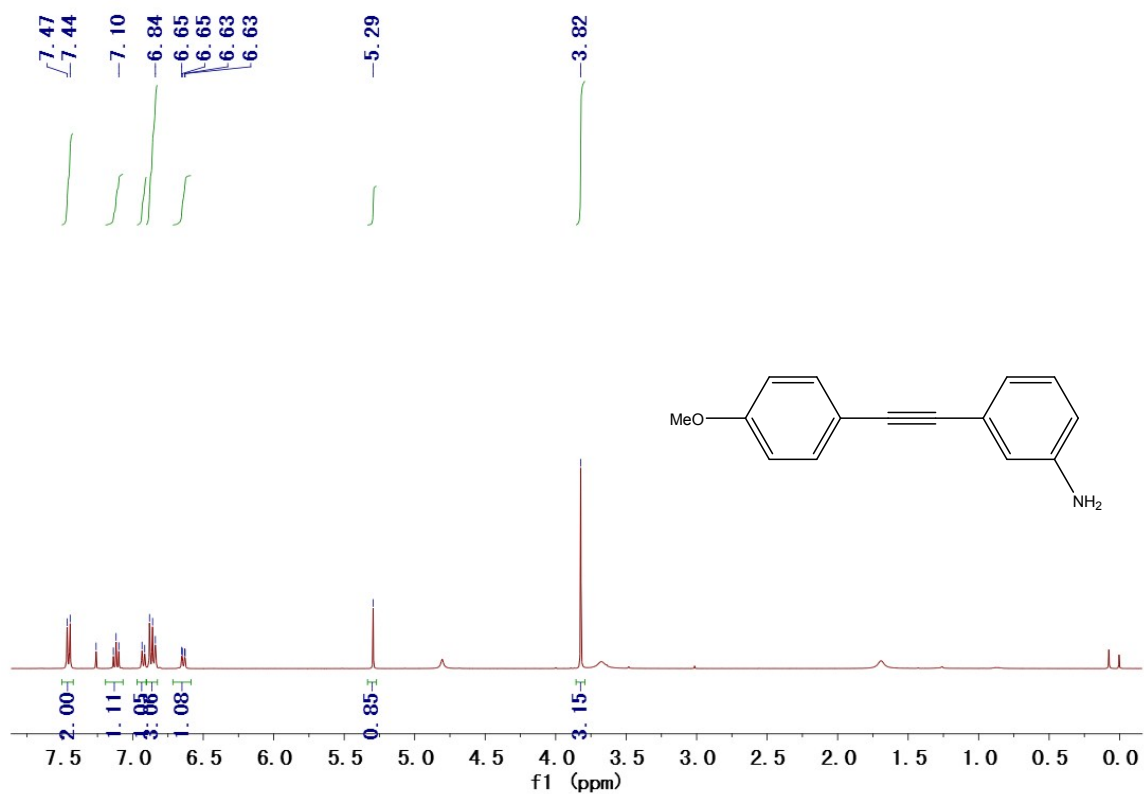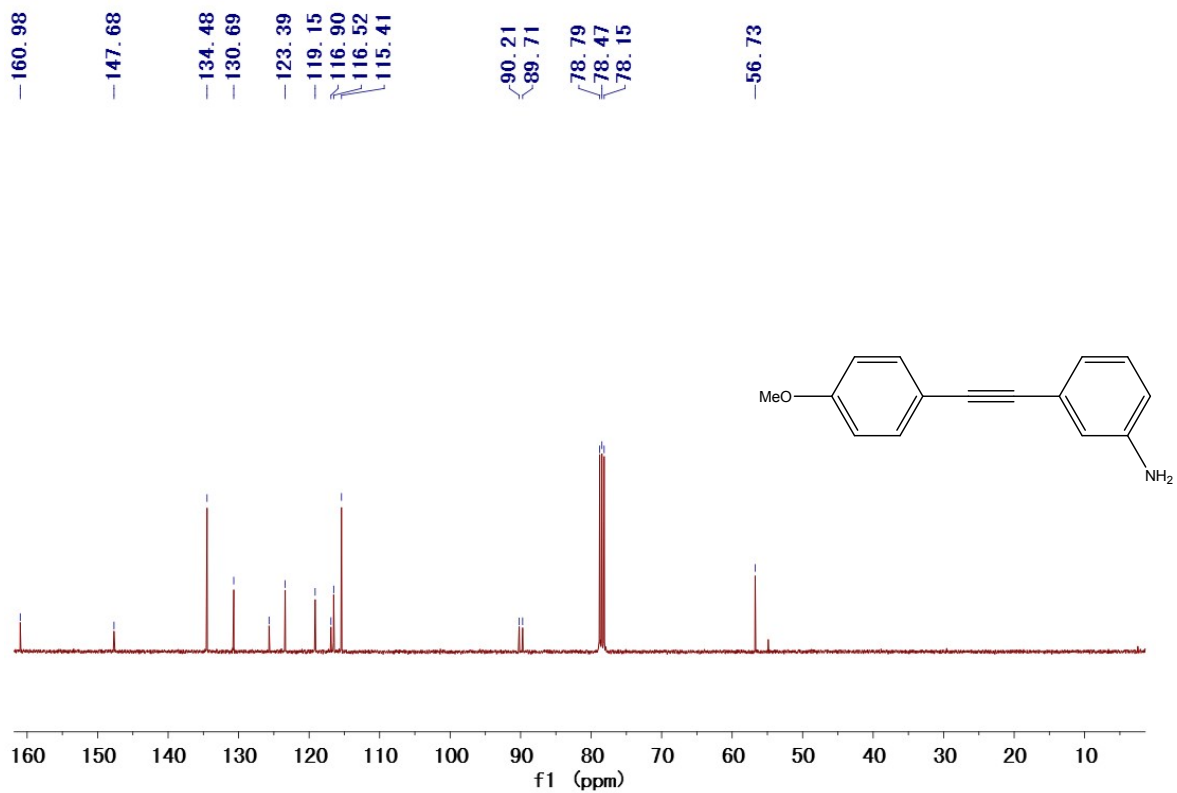

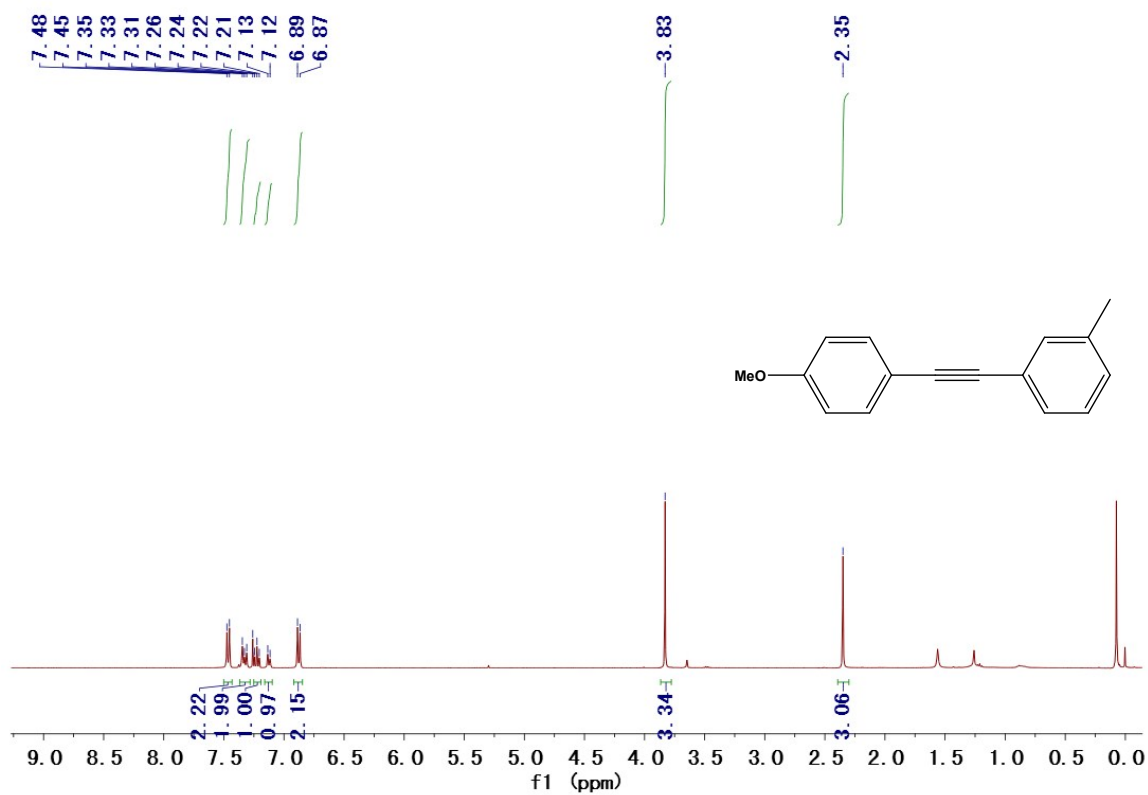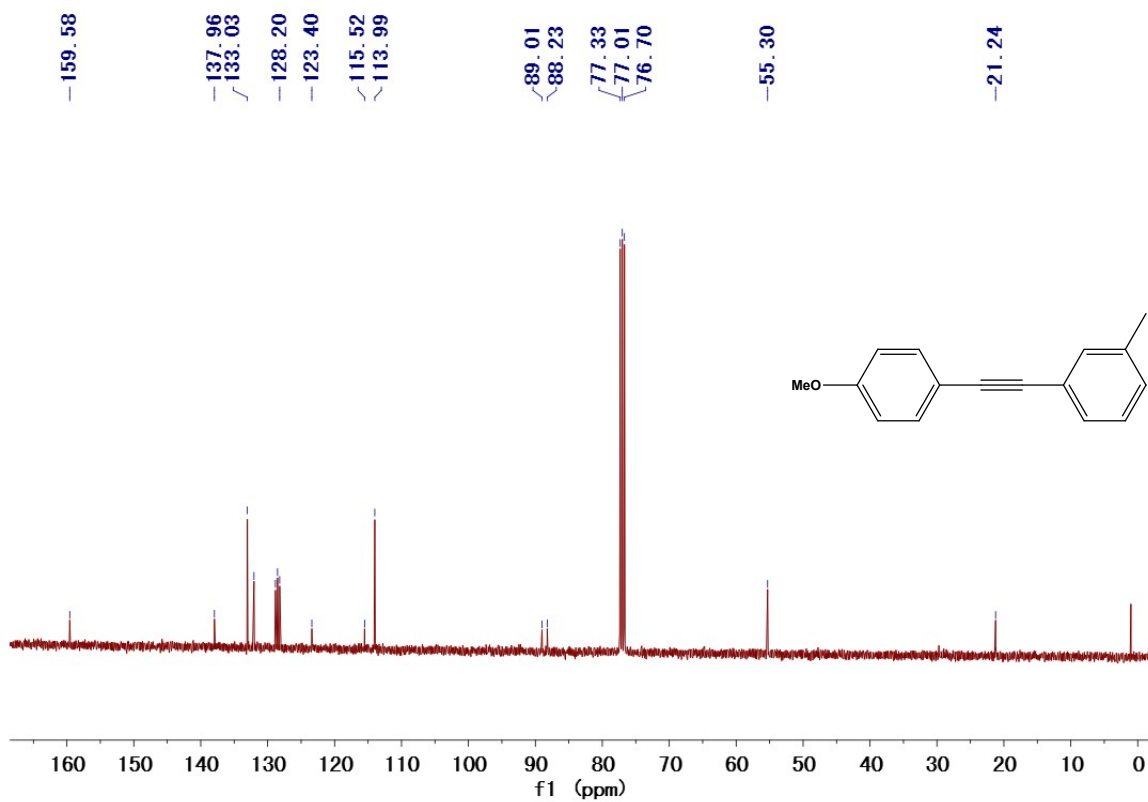

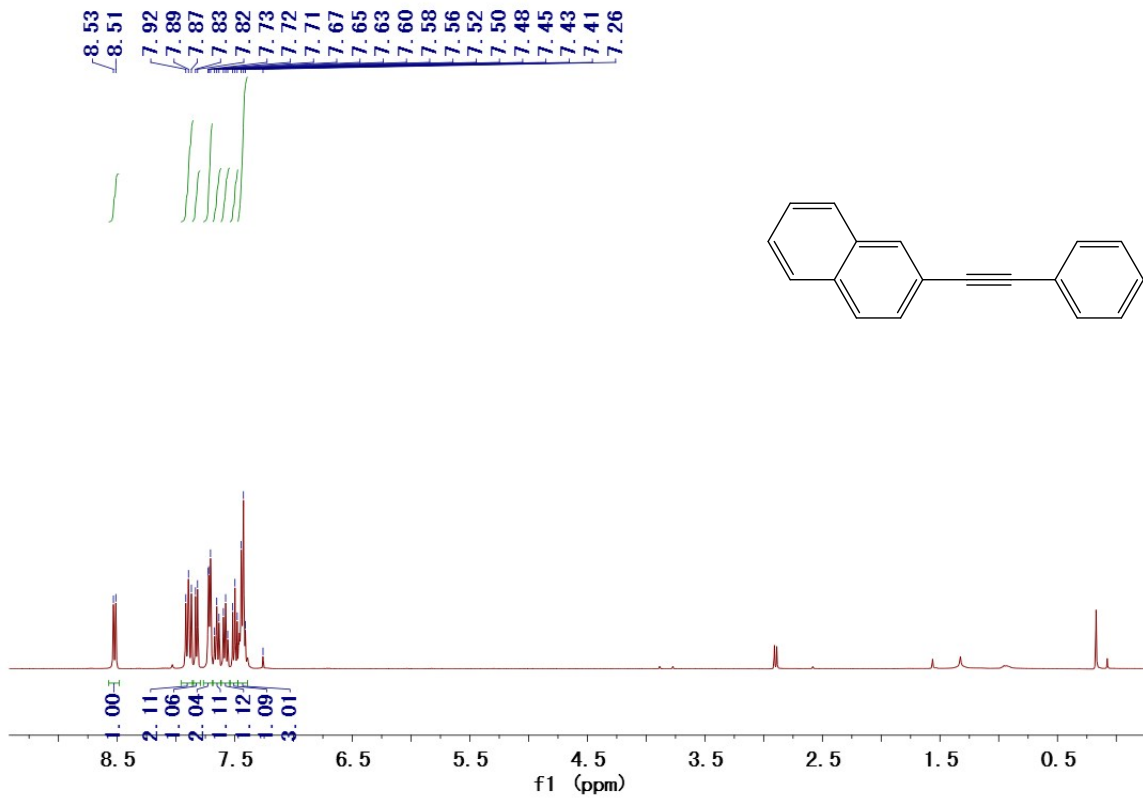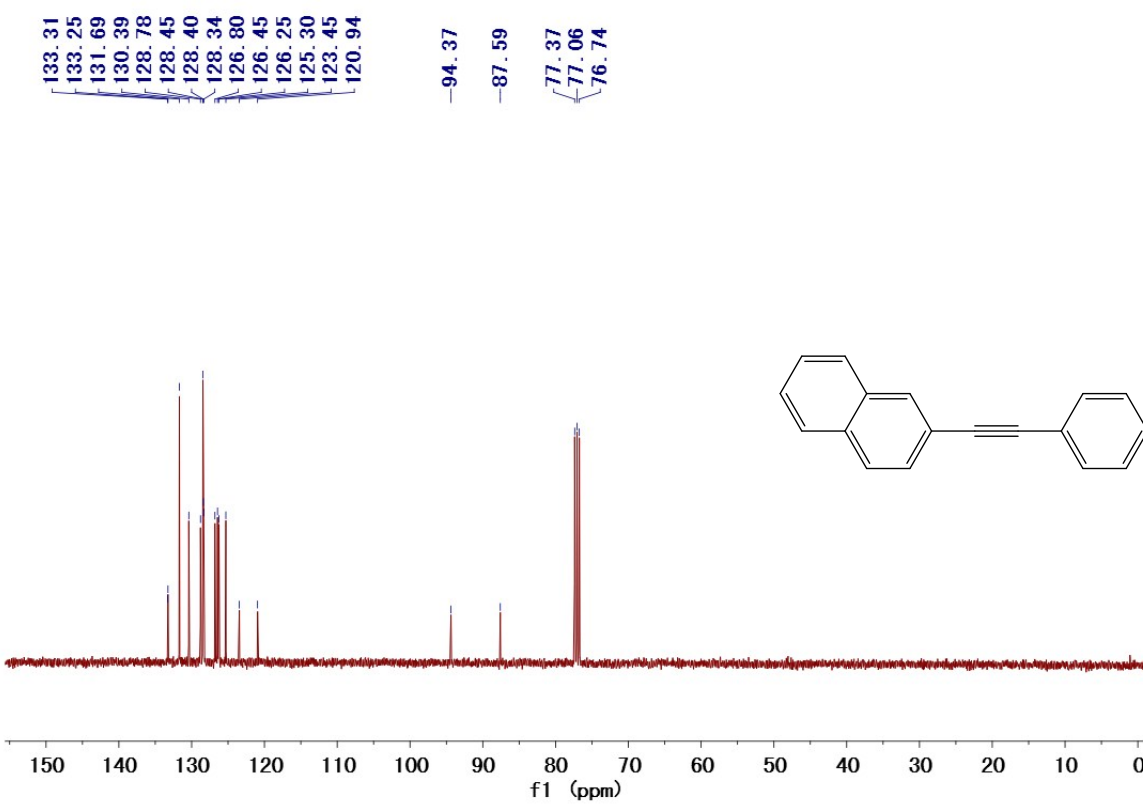

Supplement: c6ra23742h1.pdf [file c6ra23742h1.pdf]
